# Supplementary material for: Large-area waterproof and durable perovskite luminescent textiles
Source: PubMed Central journal article supplement (PMC9842651; doi:10.1038/s41467-023-35830-8), 2023-01-16
Supplement: 41467_2023_35830_MOESM1_ESM.pdf [file 41467_2023_35830_MOESM1_ESM.pdf]

## Supplementary materials for

### Large-area waterproof and durable perovskite luminescent textiles

Tian Tian<sup>1#</sup>, Meifang Yang<sup>1#</sup>, Yuxuan Fang<sup>1</sup>, Shuo Zhang<sup>1</sup>, Yuxin Chen<sup>2</sup>, Lianzhou Wang<sup>3\*</sup>, Wu-Qiang Wu<sup>1\*</sup>

<sup>1</sup>MOE Key Laboratory of Bioinorganic and Synthetic Chemistry, Lehn Institute of Functional Materials, School of Chemistry, Sun Yat-sen University; Guangzhou 510006, P. R. China

<sup>2</sup>Instrumental Analysis and Research Center, Sun Yat-sen University; Guangzhou 510275, P. R. China

<sup>3</sup>Nanomaterials Centre, School of Chemical Engineering and Australian Institute for Bioengineering and Nanotechnology, The University of Queensland; Brisbane, QLD 4072, Australia.

<sup>#</sup>These authors contributed equally to this work.

\*Corresponding author. Email: [l.wang@uq.edu.au](mailto:l.wang@uq.edu.au), [wuwq36@mail.sysu.edu.cn](mailto:wuwq36@mail.sysu.edu.cn)

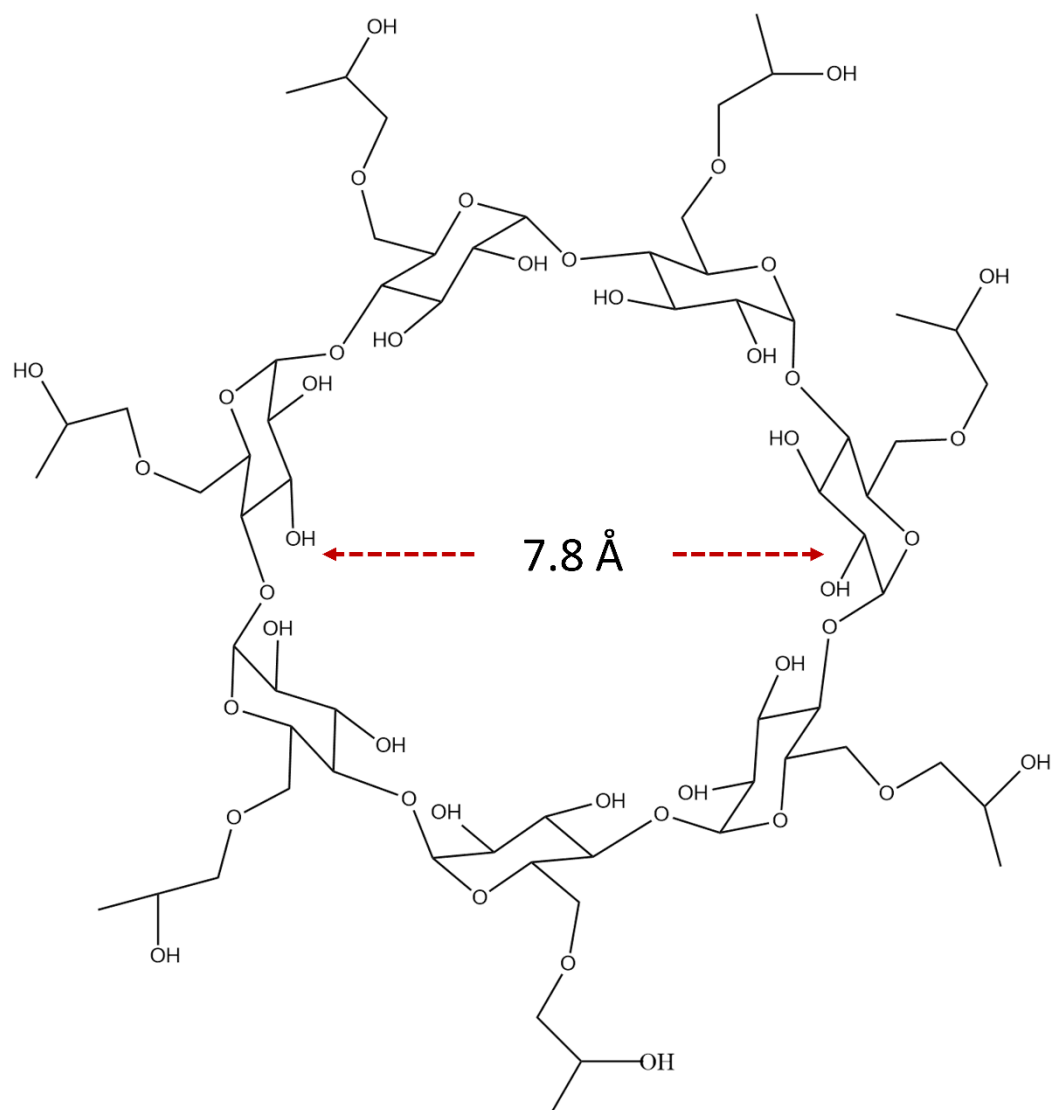

**Supplementary Fig. 1** The molecular structure of HPβCD.

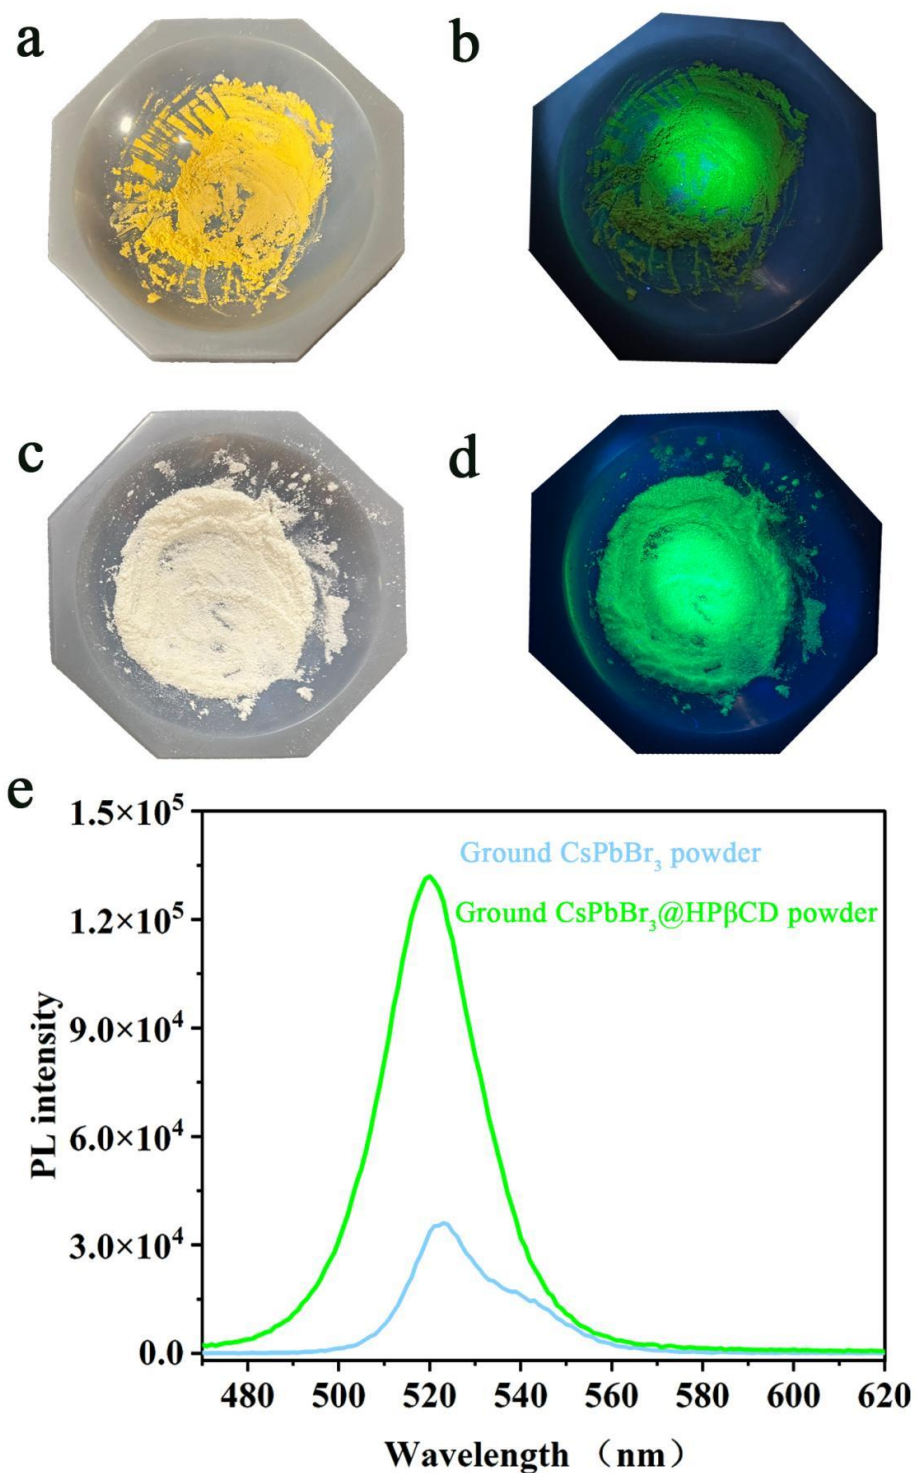

**Supplementary Fig. 2. Ground CsBr and PbBr<sub>2</sub> blends with or without HPβCD powder addition and the corresponding PL intensity spectra.** Photographs of ground powder under natural light and UV light irradiation: (a, b) CsPbBr<sub>3</sub>, (c, d) CsPbBr<sub>3</sub>@HPβCD. (e) PL spectra of ground CsPbBr<sub>3</sub> powder and CsPbBr<sub>3</sub>@HPβCD powder.

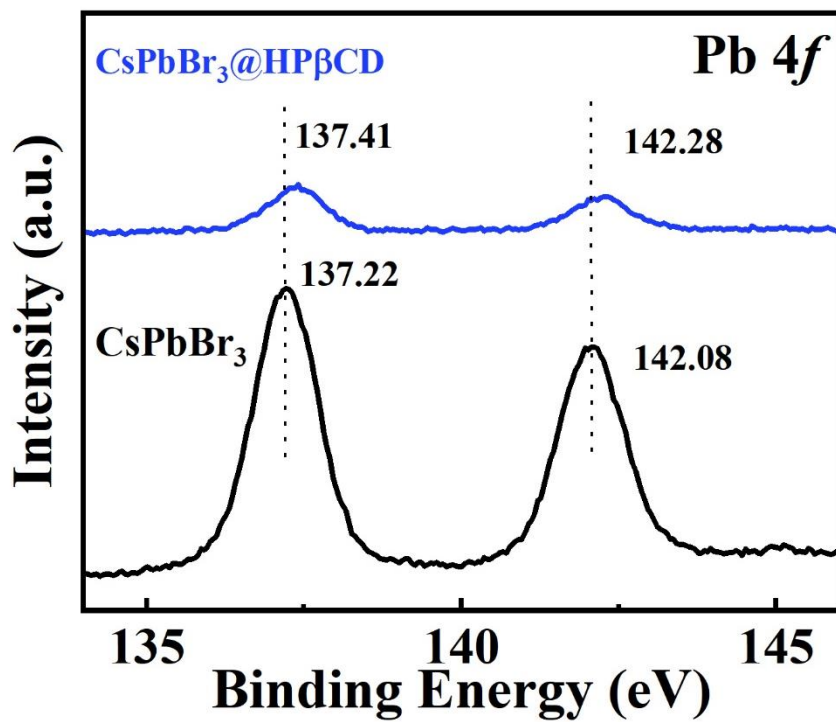

Supplementary Fig. 3. XPS spectra of Pb 4f signal of CsPbBr<sub>3</sub> and CsPbBr<sub>3</sub>@HPβCD samples.

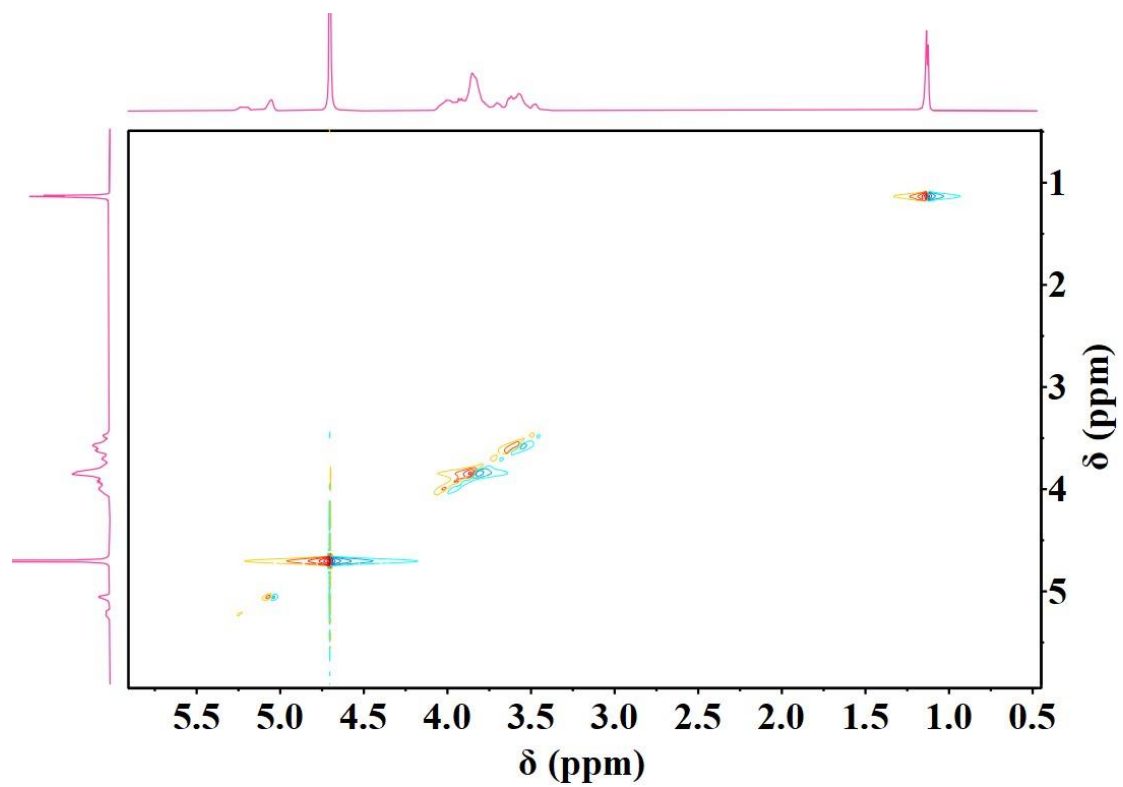

Supplementary Fig. 4. 2D  $^1\text{H}$ - $^1\text{H}$  NOESY spectrum of HP $\beta$ CD.



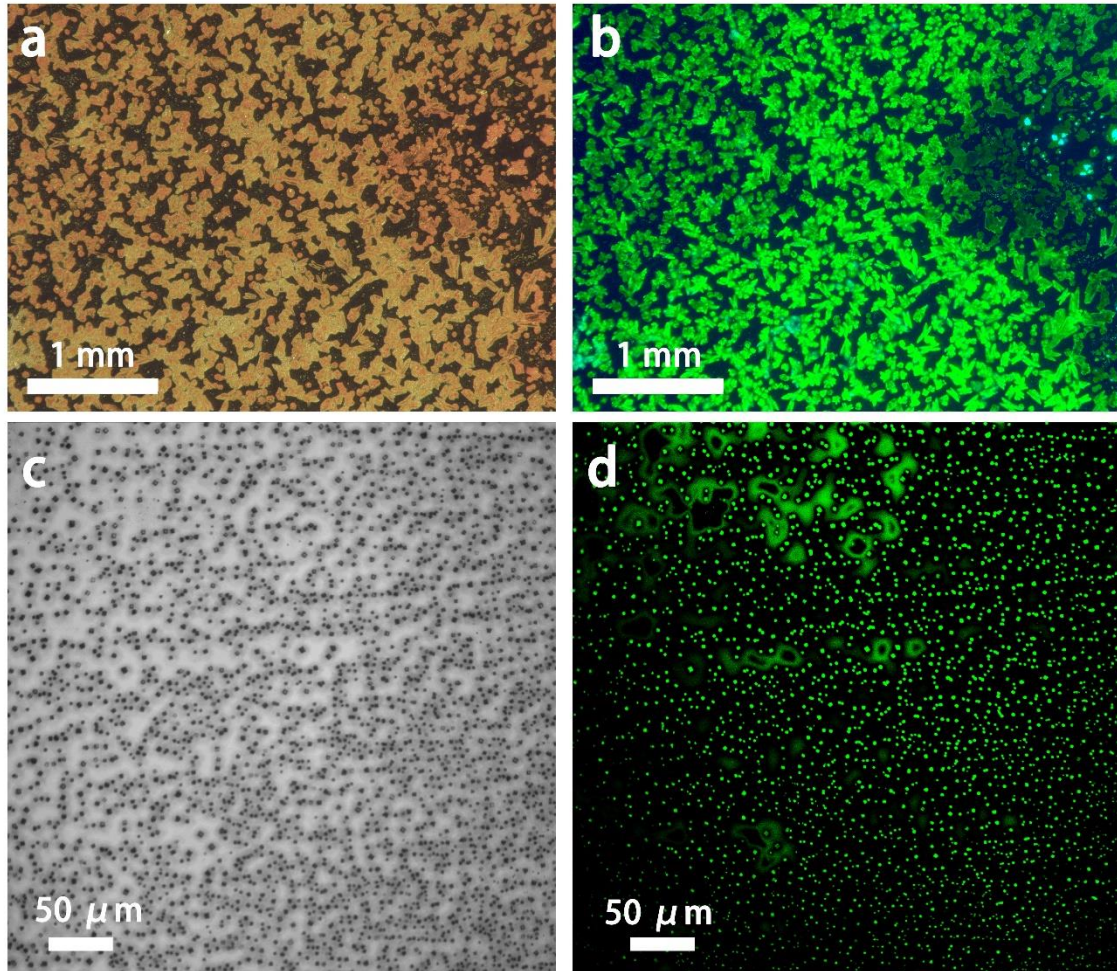

**Supplementary Fig. 6. Bright-field and fluorescence microscopy images.** The bright field and corresponding fluorescence images of (a, b) CsPbBr<sub>3</sub> powders characterized by fluorescence microscopy and (c, d) CsPbBr<sub>3</sub>@HPβCD composited powders characterized by confocal laser fluorescence microscopy.





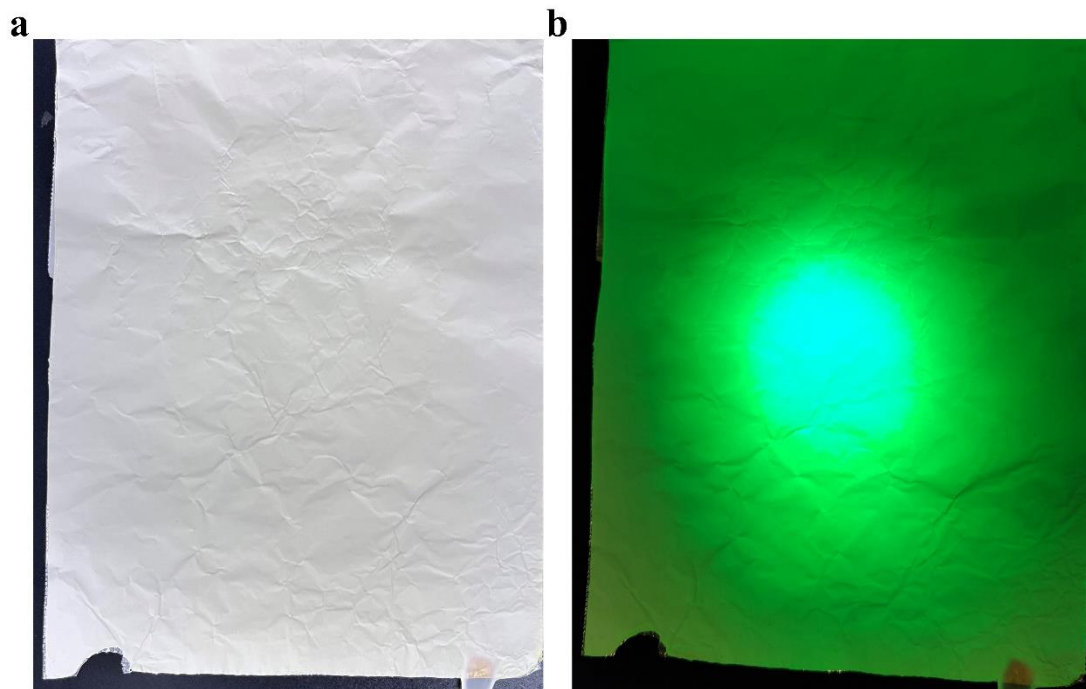

**Supplementary Fig. 8.** The PLT fabricated with electrospinning ink via directly mixing CsBr, PbBr<sub>2</sub>, HP $\beta$ CD, PS and PFOS ingredients: (a) under natural light and (b) under UV light.

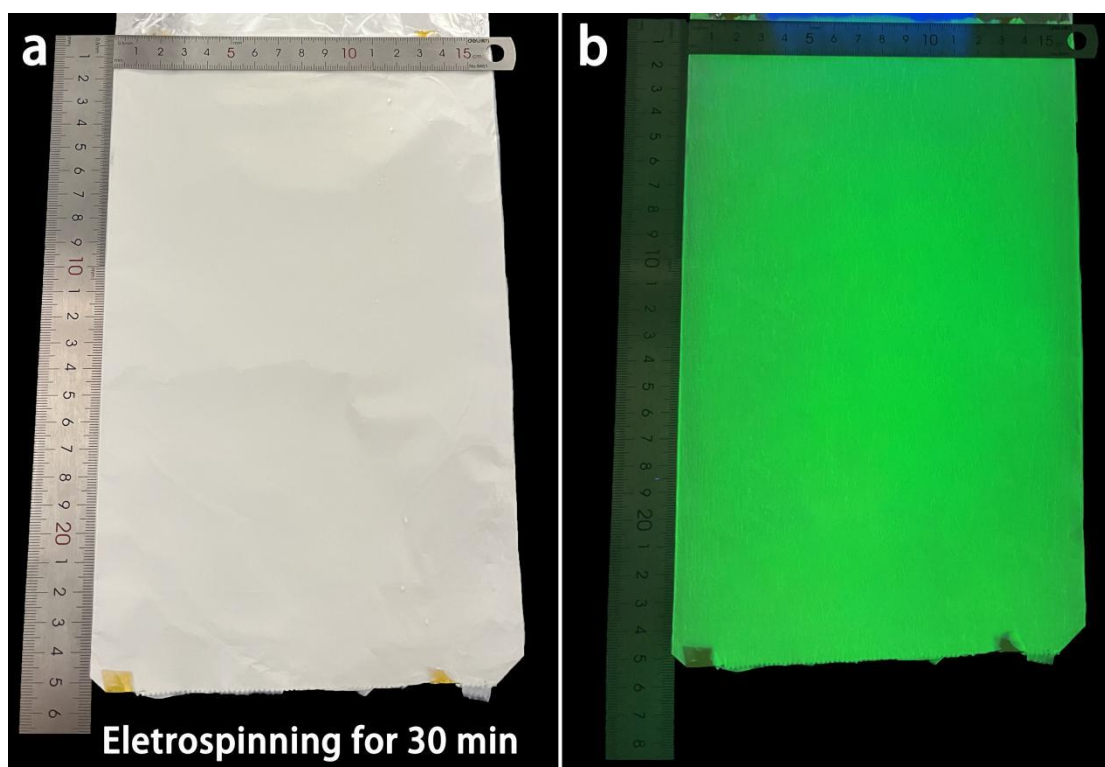

**Supplementary Fig. 9. Electrospinning a 25 cm × 15 cm PLT within 30 min.**

Photographs of a PLT prepared via electrospinning for 30 min under (a) natural light and (b) UV light.

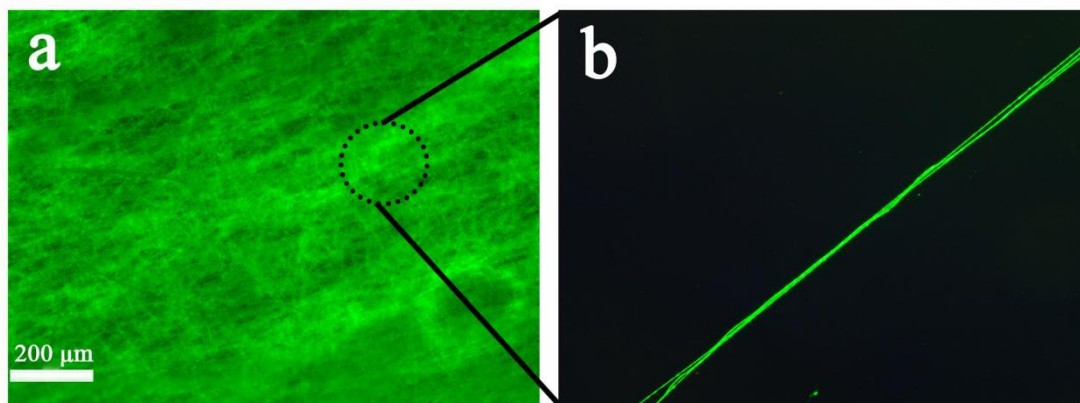

**Supplementary Fig. 10. Fluorescence images of fibrous membrane and individual fiber.** Fluorescence images of (a) as-prepared CsPbBr<sub>3</sub>@HPβCD@PFOS fibrous membrane and (b) an individual fiber.

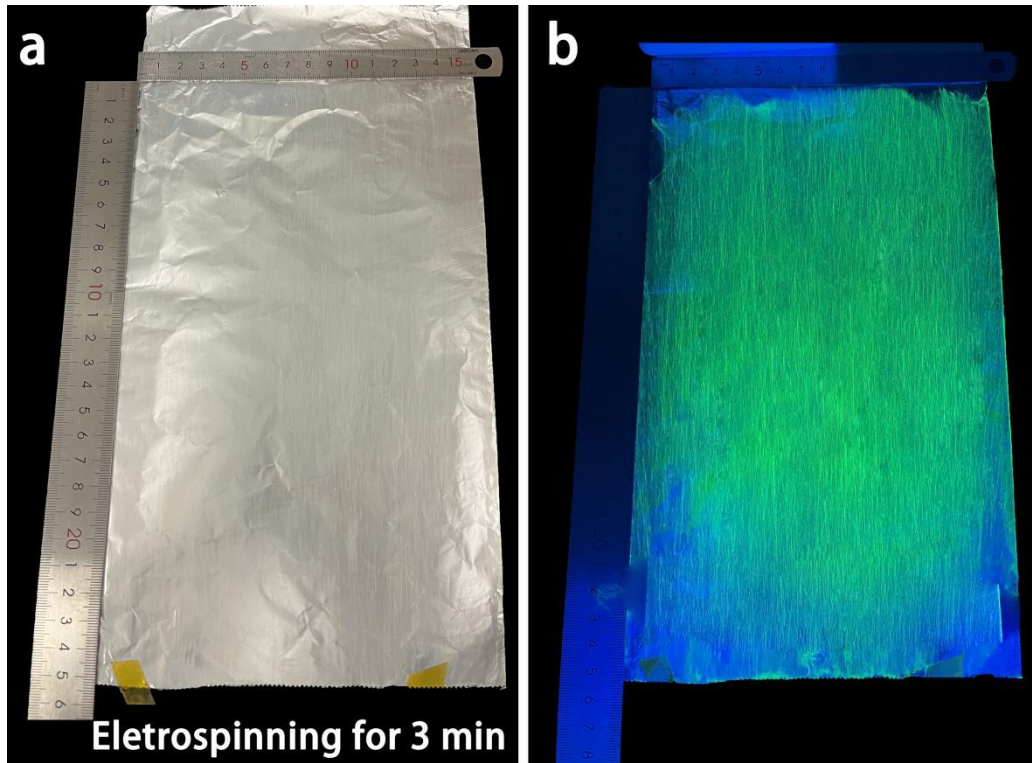

**Supplementary Fig. 11. Electrospinning a 25 cm × 15 cm PLT within 3 min.**

Photograph of the PLT prepared via electrospinning for 3 min under (a) natural light and (b) UV light.

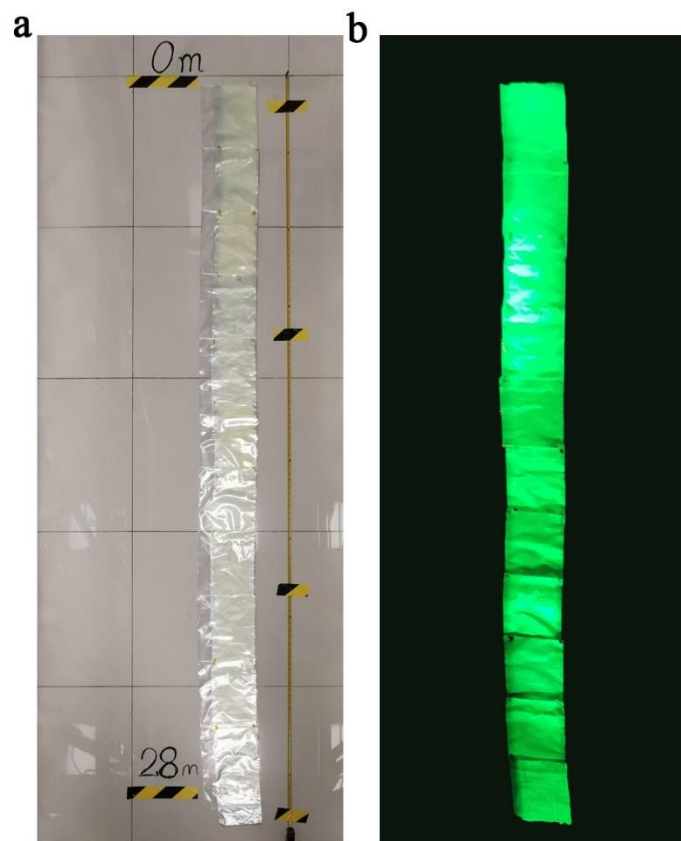

**Supplementary Fig. 12.** Demonstration of a 2.8 m PLT (280 cm × 15 cm) under (a) natural light and (b) UV light irradiation.

**Supplementary Table 1.** Cost evaluation of the luminous textile (280 cm × 15 cm, equal to an area of 0.42 m<sup>2</sup>).

|                         | <b>Ingredients</b> | <b>Unit price (USD)</b> | <b>Usage amount</b> | <b>Price (USD)</b> |                                        |
|-------------------------|--------------------|-------------------------|---------------------|--------------------|----------------------------------------|
| <b>PLTs fabrication</b> | CsBr               | 34.65/50 g              | 0.170 g             | 0.12               | <b>Cost: 0.05 cents m<sup>-2</sup></b> |
|                         | PbBr <sub>2</sub>  | 9.31/25 g               | 0.294 g             | 0.11               |                                        |
|                         | HPβCD              | 16.38/100 g             | 0.104 g             | 0.02               |                                        |
|                         | PFOS               | 33.86/25 mL             | 1.2 mL              | 1.63               |                                        |
|                         | DMF                | 3.15/500 ml             | 5.6 ml              | 0.04               |                                        |
|                         | DMSO               | 6.93/100 ml             | 2.4 ml              | 0.17               |                                        |
|                         | PS                 | 11.09/500 g             | 1.22 g              | 0.03               |                                        |
| <b>Total price</b>      |                    |                         |                     | 2.12               |                                        |

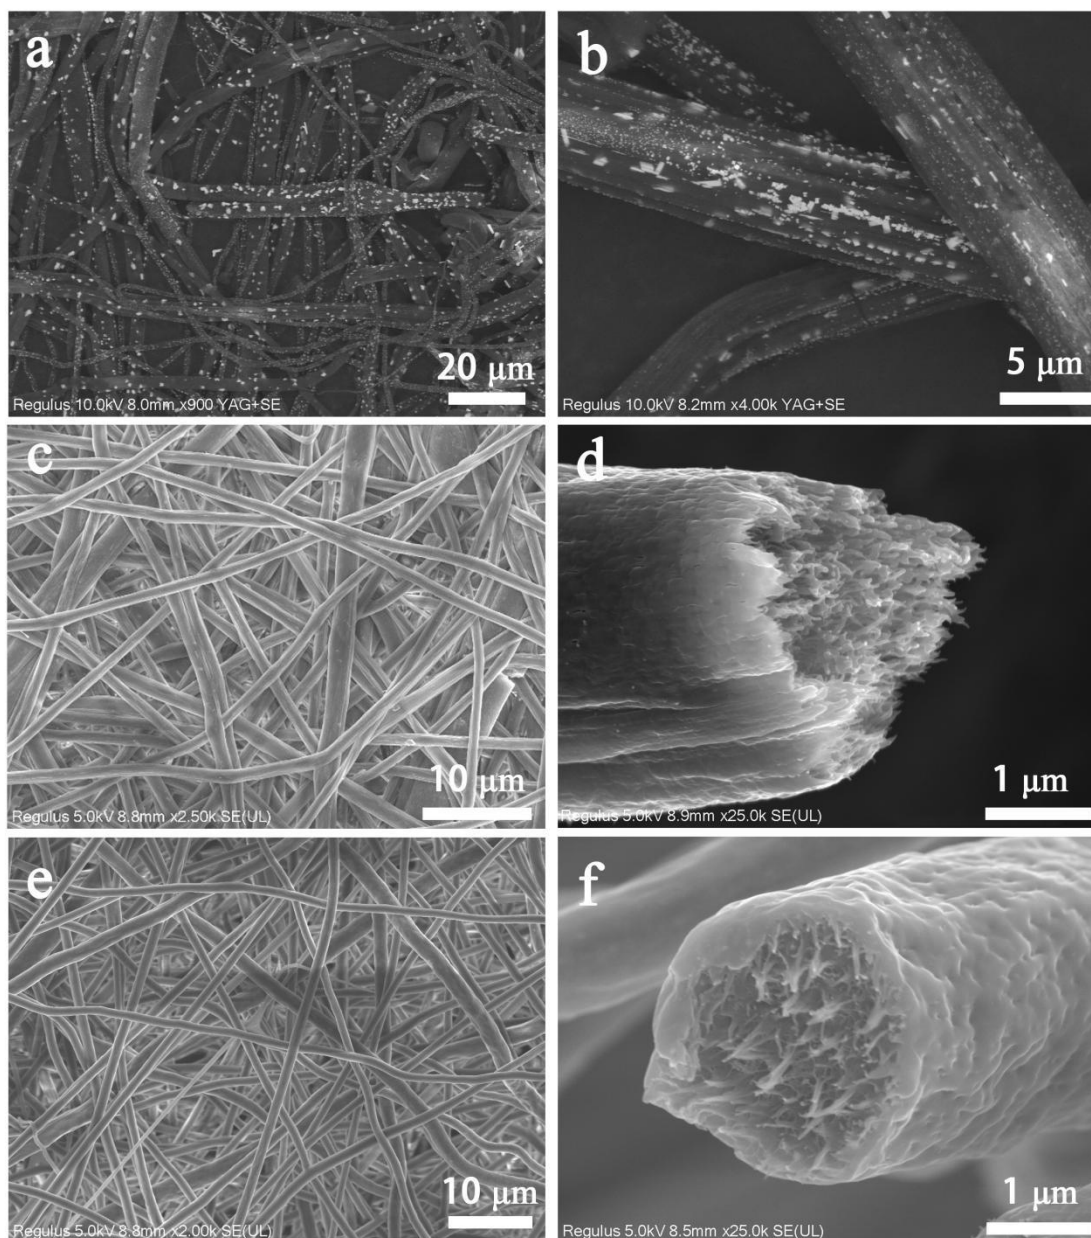

**Supplementary Fig. 13. Morphological structures of different PLTs.** SEM images of (a, b) CsPbBr<sub>3</sub> fibers, (c, d) CsPbBr<sub>3</sub>@HPβCD fibers and (e, f) CsPbBr<sub>3</sub>@HPβCD@PFOS fibers.

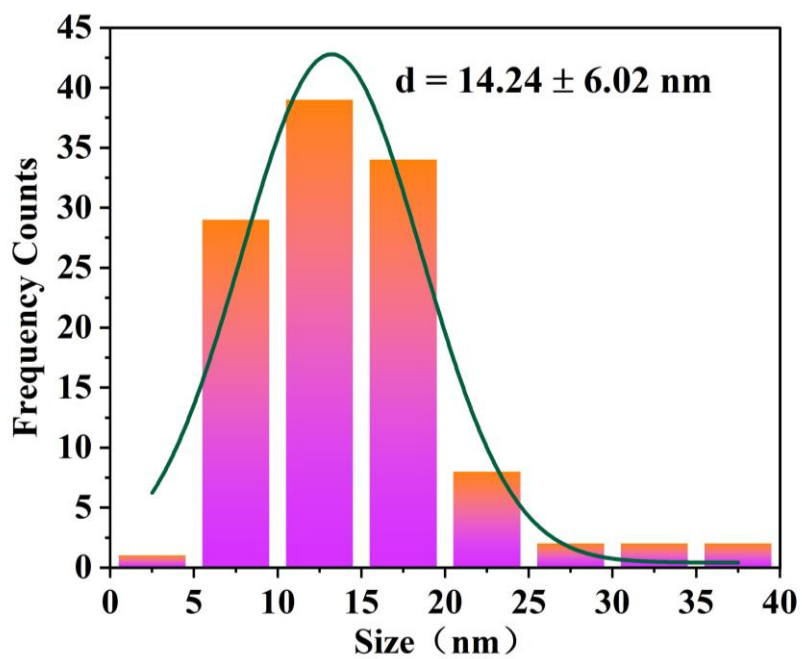

**Supplementary Fig. 14.** The statistic of size distribution of CsPbBr<sub>3</sub> NCs in the CsPbBr<sub>3</sub>@HPβCD@PFOS fiber.



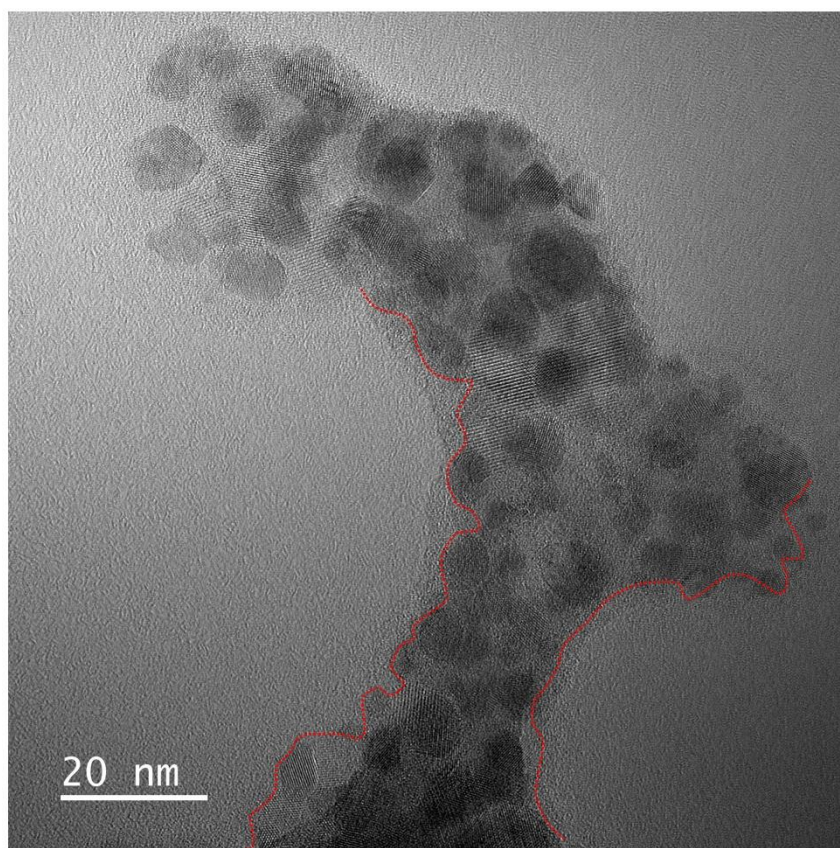

**Supplementary Fig. 15.** The HRTEM image of CsPbBr<sub>3</sub>@HPβCD.

Note: the CsPbBr<sub>3</sub>@HPβCD composited nanocrystals were prepared by dissolving the CsPbBr<sub>3</sub>@HPβCD fibers in chlorobenzene (CB) solution followed by ultrasonic dispersion.

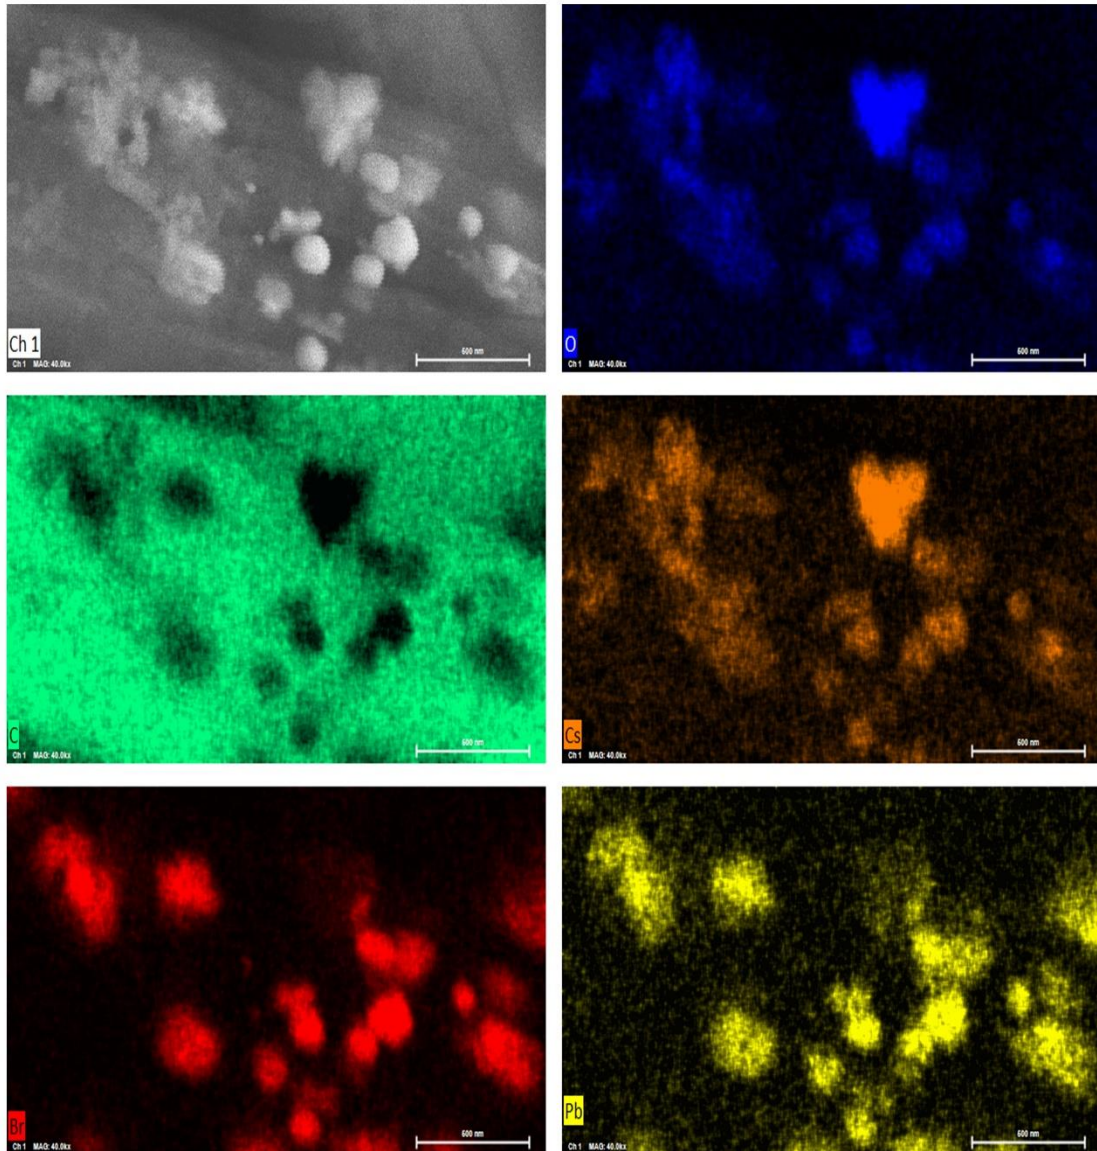

**Supplementary Fig. 16.** The SEM elemental mapping of CsPbBr<sub>3</sub> fibers.

**Supplementary Table 2.** The element percentage of CsPbBr<sub>3</sub> fibers.

| <b>Element</b> | <b>At.No.</b> | <b>Mass Norm.<br/>[%]</b> | <b>Atom [%]</b> | <b>Abs.error [%]</b> |
|----------------|---------------|---------------------------|-----------------|----------------------|
| <b>C</b>       | 6             | 59.07                     | 89.90           | 1.31                 |
| <b>Cs</b>      | 55            | 22.27                     | 3.06            | 0.60                 |
| <b>Br</b>      | 35            | 7.34                      | 1.68            | 0.10                 |
| <b>Pb</b>      | 82            | 7.19                      | 0.63            | 0.10                 |
| <b>O</b>       | 8             | 4.13                      | 4.72            | 0.13                 |
| <b>Total</b>   |               | 100.00                    | 100.00          |                      |

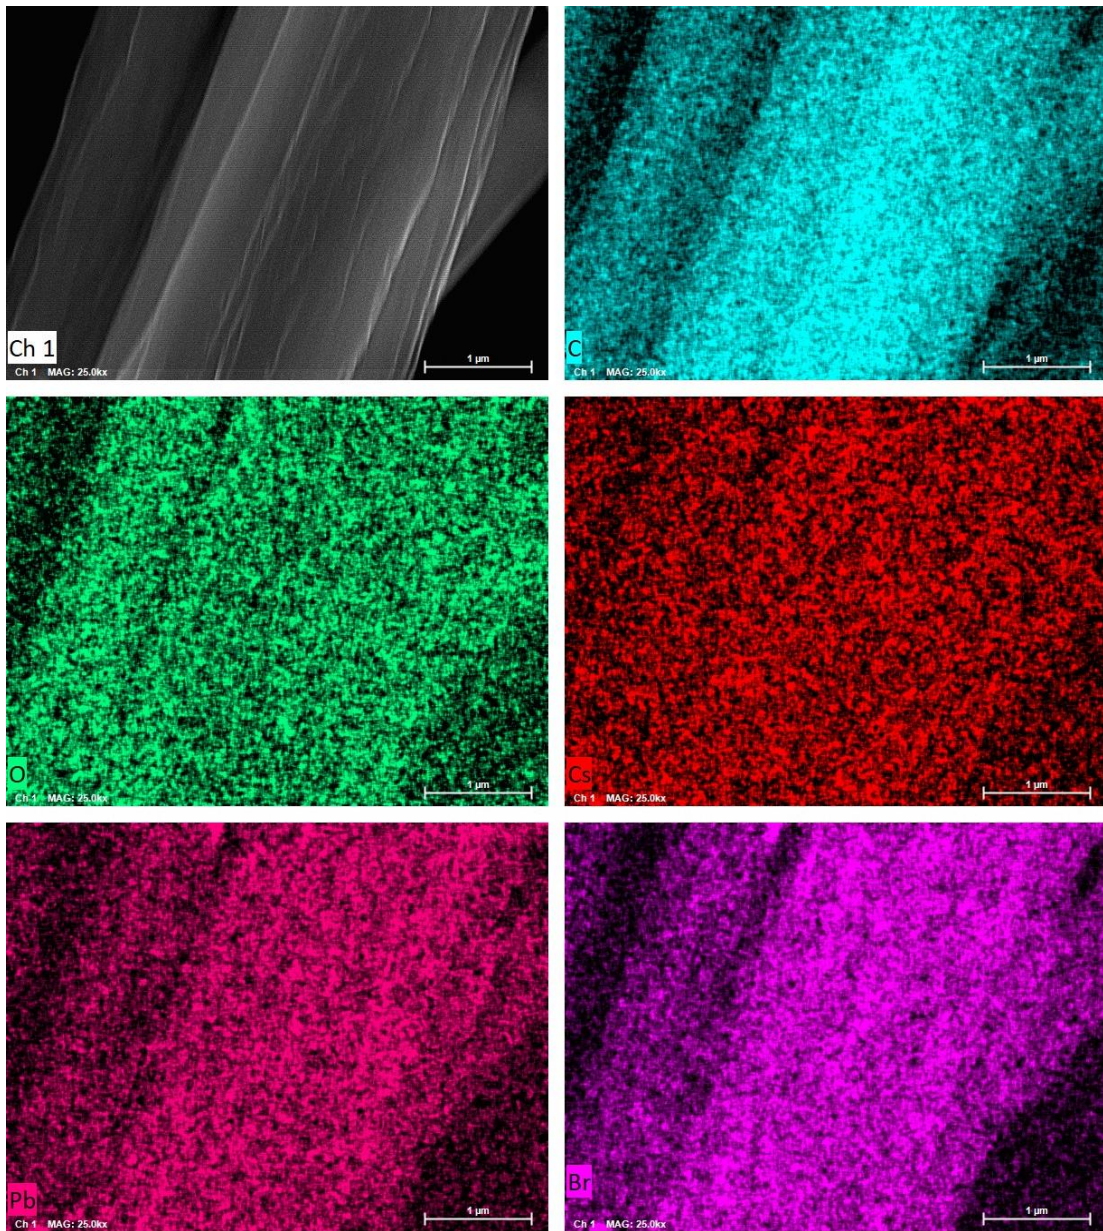

**Supplementary Fig. 17.** The SEM elemental mapping of CsPbBr<sub>3</sub>@HPβCD fibers.

**Supplementary Table 3.** The element percentage of CsPbBr<sub>3</sub>@HPβCD fibers.

| <b>Element</b> | <b>At.No.</b> | <b>Mass<br/>Norm.[%]</b> | <b>Atom [%]</b> | <b>Abs.error [%]</b> |
|----------------|---------------|--------------------------|-----------------|----------------------|
| <b>C</b>       | 6             | 86.08                    | 90.91           | 8.77                 |
| <b>Cs</b>      | 55            | 0.63                     | 0.06            | 0.05                 |
| <b>Br</b>      | 35            | 1.36                     | 0.22            | 0.09                 |
| <b>Pb</b>      | 82            | 0.88                     | 0.05            | 0.06                 |
| <b>O</b>       | 8             | 11.06                    | 8.77            | 1.30                 |
| <b>Total</b>   |               | 100.00                   | 100.00          |                      |

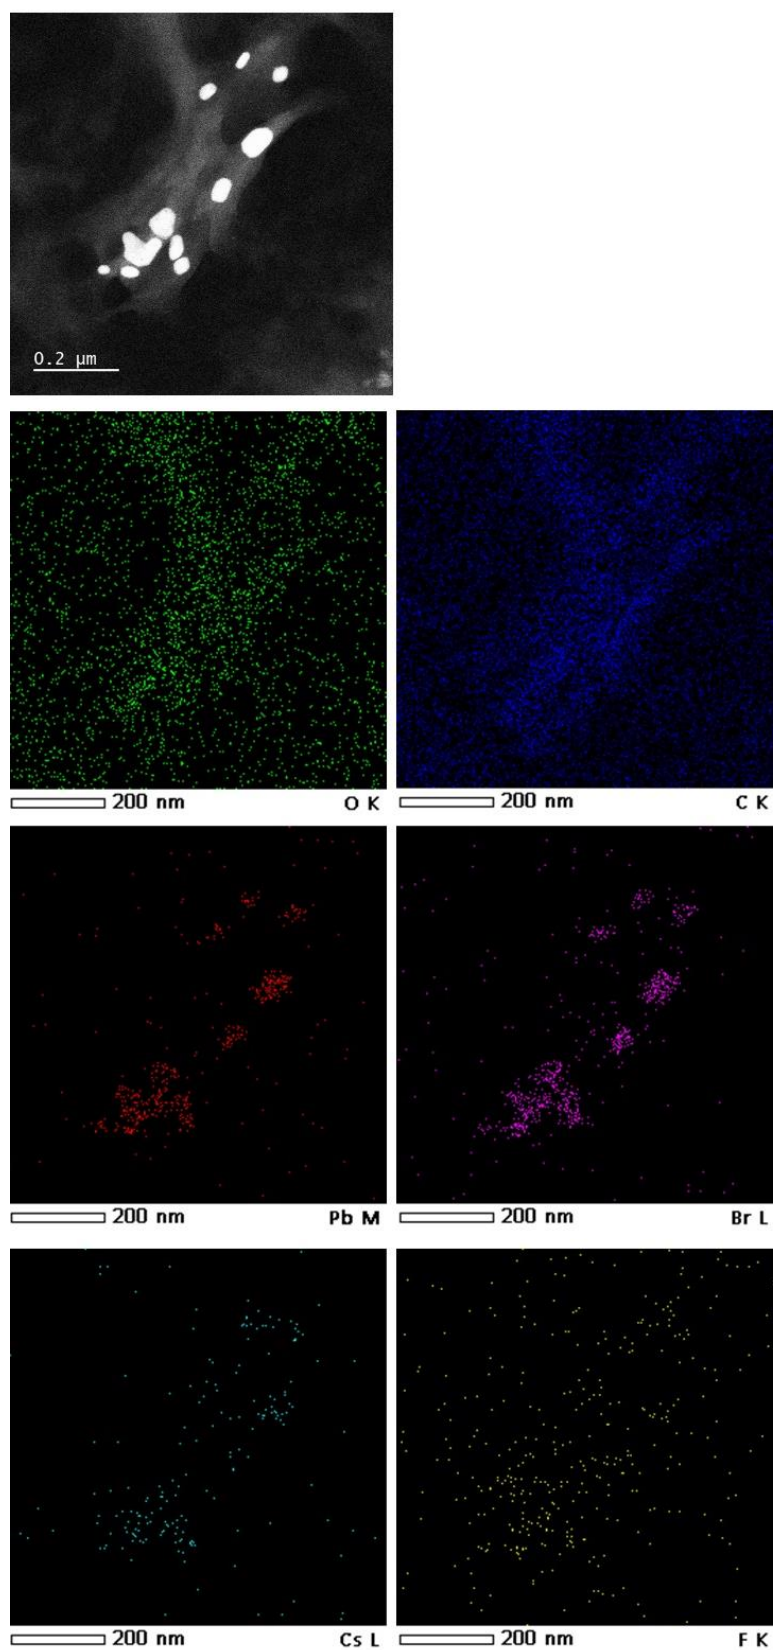

**Supplementary Fig. 18.** The HRTEM elemental mapping of CsPbBr<sub>3</sub> nanocrystals in CsPbBr<sub>3</sub>@HPβCD@PFOS fibers.

**Supplementary Table 4.** The element percentage of CsPbBr<sub>3</sub>@HPβCD@PFOS fibers.

| <b>Element</b> | <b>At.No.</b> | <b>Mass Norm.[%]</b> | <b>Atom [%]</b> | <b>Abs.error [%]</b> |
|----------------|---------------|----------------------|-----------------|----------------------|
| <b>C</b>       | 6             | 88.22                | 93.46           | 0.67                 |
| <b>Cs</b>      | 55            | 0.52                 | 0.05            | 0.08                 |
| <b>Br</b>      | 35            | 2.18                 | 0.35            | 0.20                 |
| <b>Pb</b>      | 82            | 1.45                 | 0.09            | 0.17                 |
| <b>O</b>       | 8             | 7.51                 | 5.97            | 0.23                 |
| <b>F</b>       | 9             | 0.13                 | 0.08            | 0.03                 |
| <b>Total</b>   |               | 100.00               | 100.00          |                      |

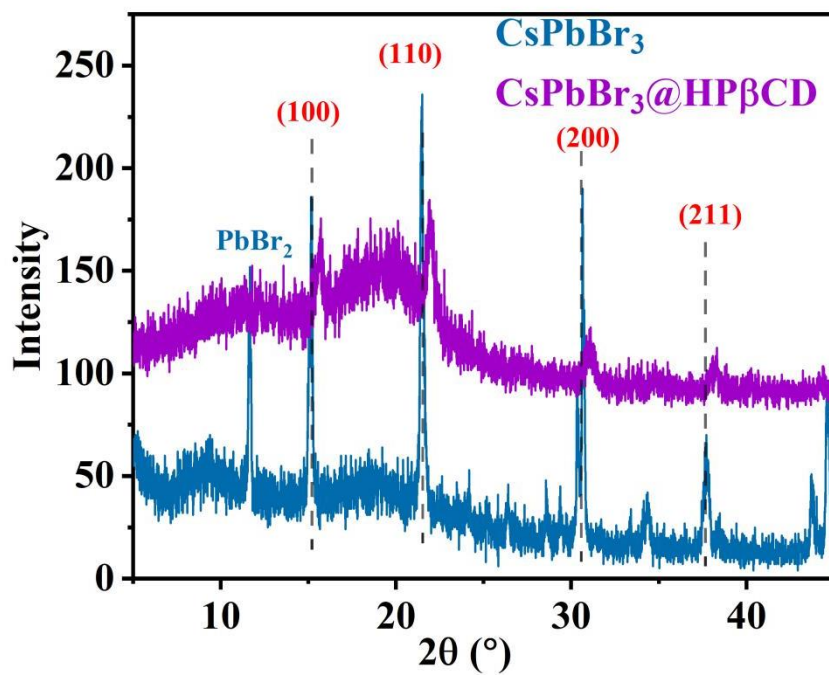

**Supplementary Fig. 19.** XRD patterns of different PLTs. XRD patterns of CsPbBr<sub>3</sub> and CsPbBr<sub>3</sub>@HPβCD fibers.



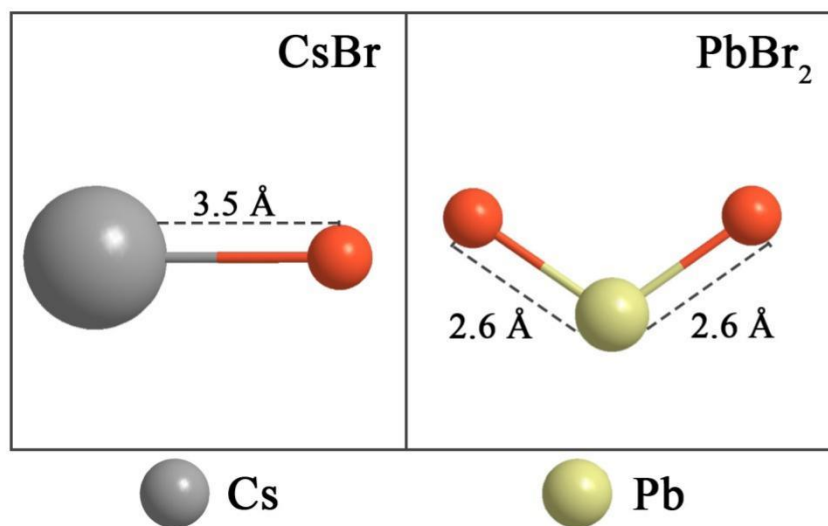

**Supplementary Fig. 20.** The calculated molecular lengths of CsBr and PbBr<sub>2</sub>.

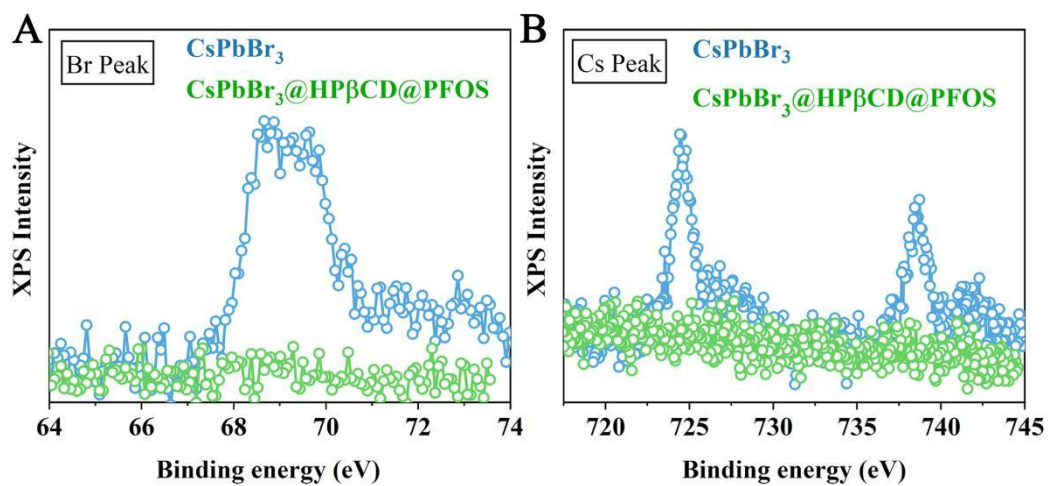

**Supplementary Fig. 21. X-ray photoelectron spectroscopy (XPS) of CsPbBr<sub>3</sub> and CsPbBr<sub>3</sub>@HPβCD@PFOS fibers.** XPS spectra of the (a) Br signal and (b) Cs signal of the CsPbBr<sub>3</sub> fibers and CsPbBr<sub>3</sub>@HPβCD@PFOS fibers.

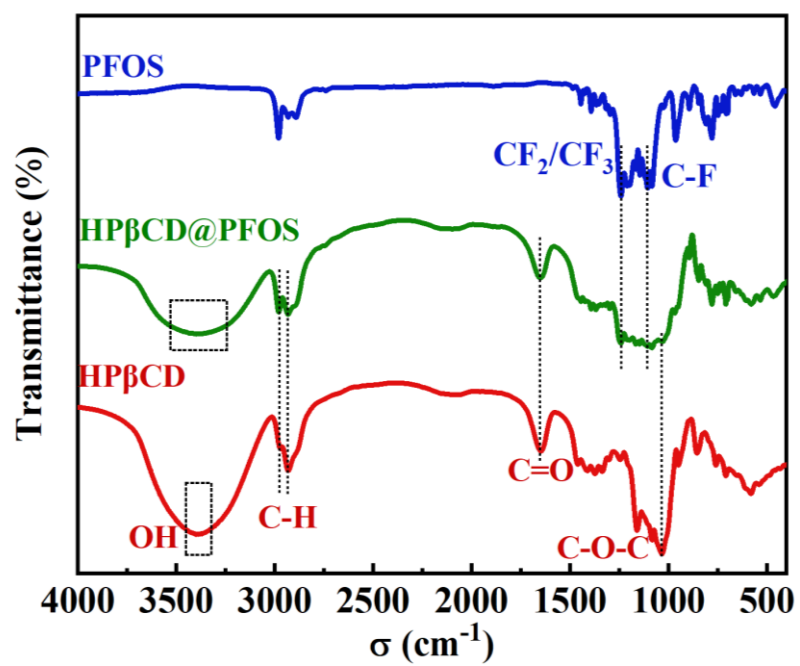

Supplementary Fig. 22. FTIR spectra of HP $\beta$ CD, PFOS and HP $\beta$ CD@PFOS.

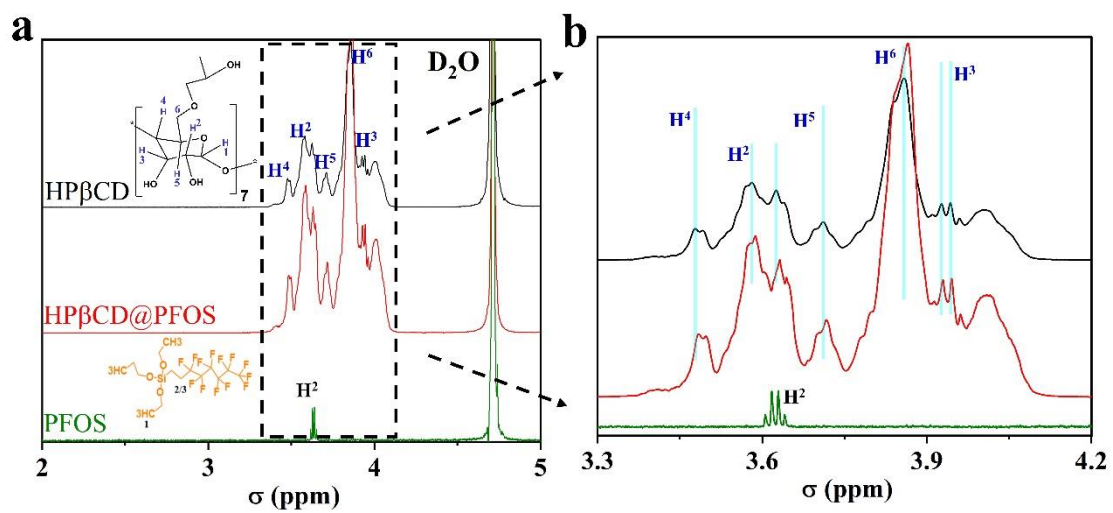

**Supplementary Fig. 23.** The  $^1\text{H}$ NMR spectra of HP $\beta$ CD, PFOS and HP $\beta$ CD@PFOS (a), and its enlarged view as indicated (b).

**Supplementary Table 5.** The  $^1\text{H}$  NMR positions of HP $\beta$ CD and HP $\beta$ CD@PFOS.

| <b>Proton</b>        | <b>HP<math>\beta</math>CD<br/>(ppm)</b> | <b>HP<math>\beta</math>CD@PFOS<br/>(ppm)</b> |
|----------------------|-----------------------------------------|----------------------------------------------|
| <b>H<sup>2</sup></b> | 3.6248                                  | 3.6321                                       |
| <b>H<sup>3</sup></b> | 3.9265                                  | 3.9293                                       |
| <b>H<sup>4</sup></b> | 3.4777                                  | 3.4835                                       |
| <b>H<sup>5</sup></b> | 3.7106                                  | 3.7165                                       |
| <b>H<sup>6</sup></b> | 3.8584                                  | 3.8654                                       |

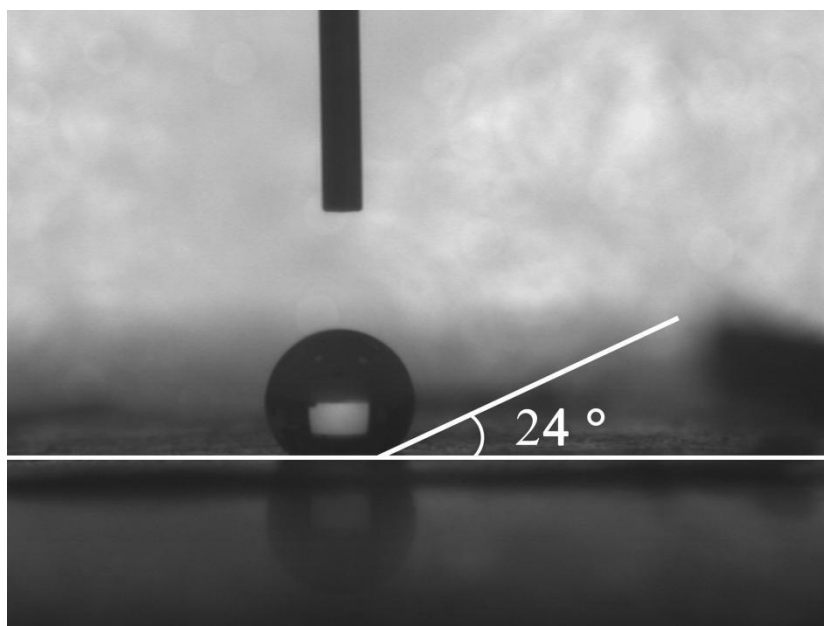

**Supplementary Fig. 24. Surface wettability characterization.** Contact angle testing of a water drop on the PLT.

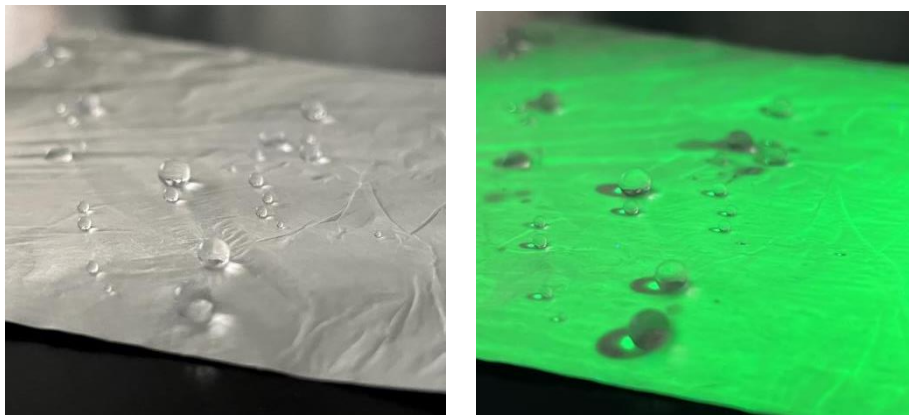

**Supplementary Fig. 25. Surface hydrophobicity of the PLT.** Images of water droplets on the CsPbBr<sub>3</sub>@HP $\beta$ CD@PFOS fibrous membrane under natural light (left) and UV light (right).

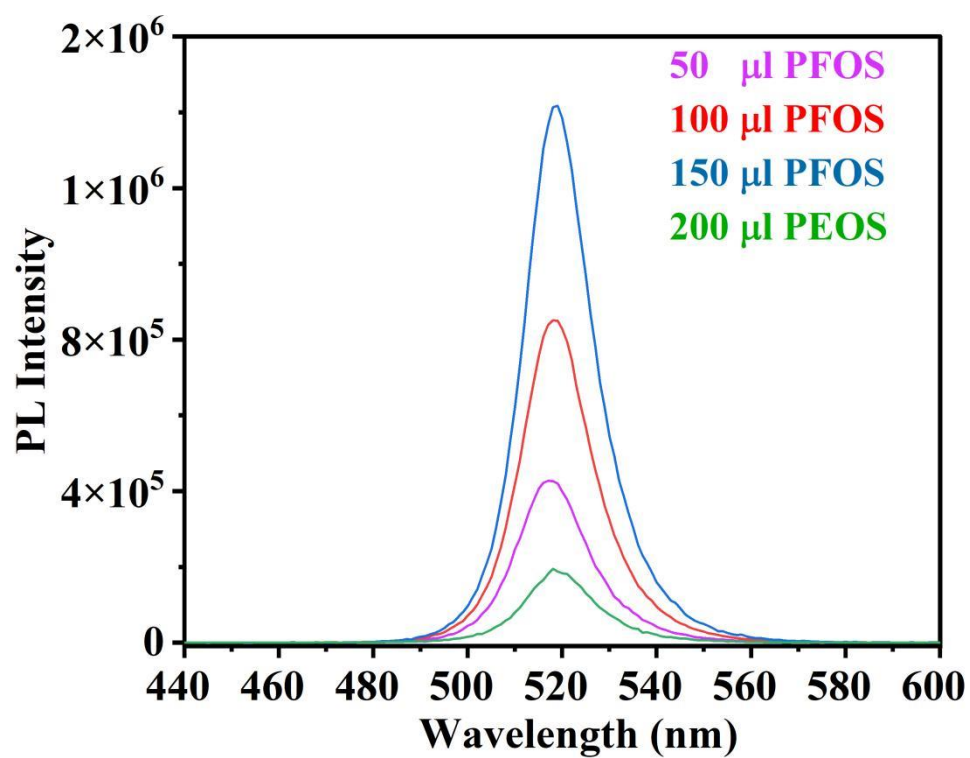

**Supplementary Fig. 26. Optimization of PFOS content.** PL intensity spectra of the CsPbBr<sub>3</sub>@HP $\beta$ CD@PFOS sample fabricated with different PFOS contents.



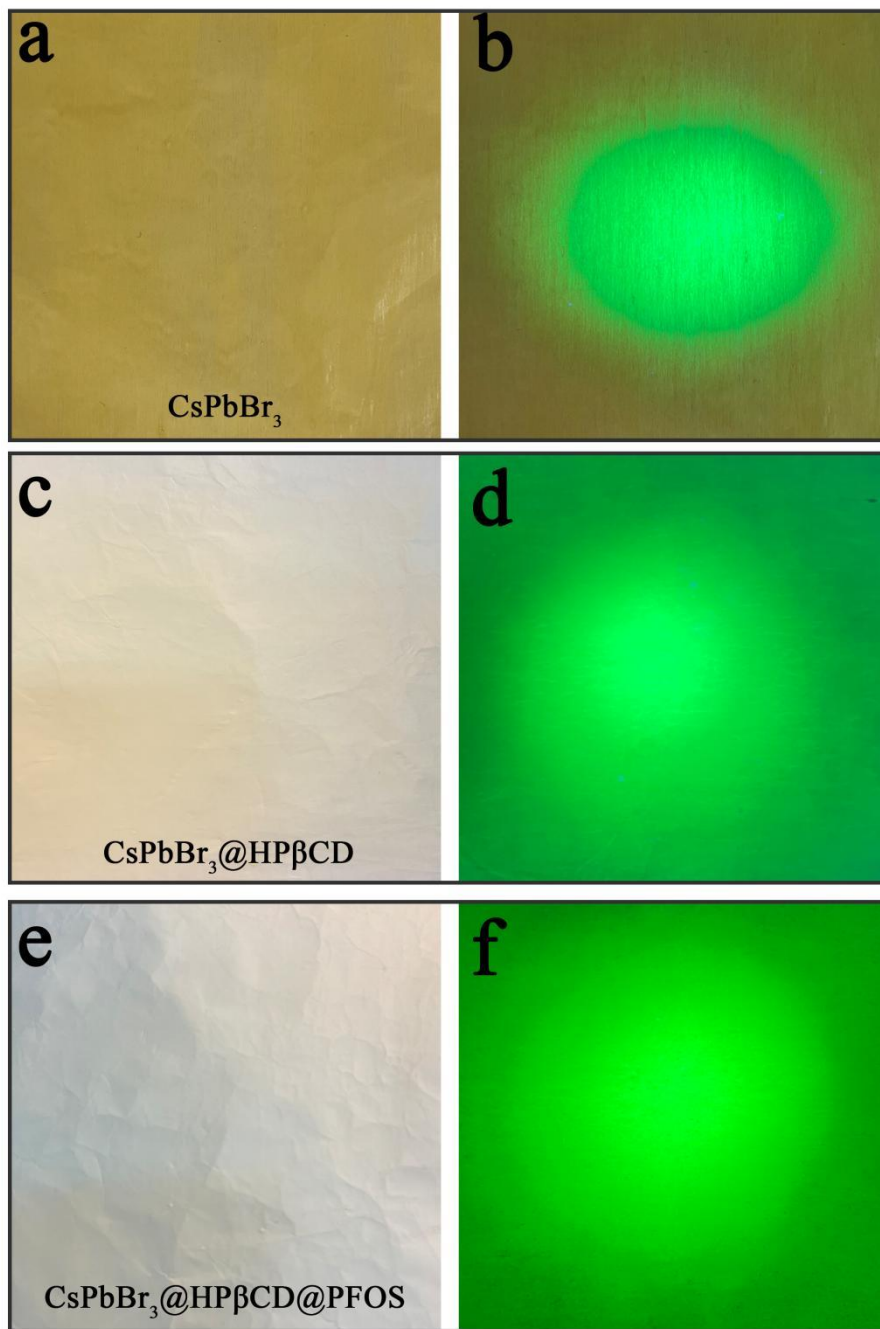

**Supplementary Fig. 27. Luminescent images of different PLTs under natural light (left) and UV light (365 nm, right): (a, b) CsPbBr<sub>3</sub>, (c, d) CsPbBr<sub>3</sub>@HPβCD and (e, f) CsPbBr<sub>3</sub>@HPβCD@PFOS.**

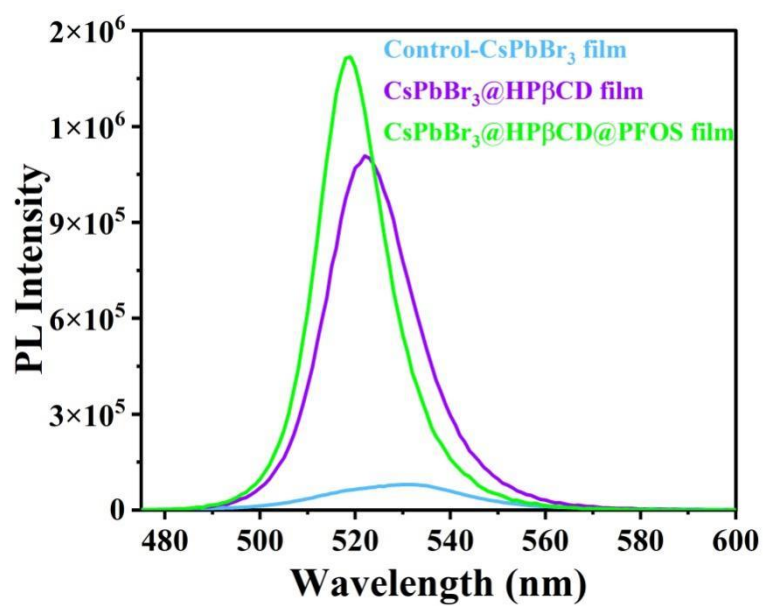

**Supplementary Fig. 28. PL intensities of different PLTs.** The PL intensity comparison of CsPbBr<sub>3</sub>, CsPbBr<sub>3</sub>@HPβCD and CsPbBr<sub>3</sub>@HPβCD@PFOS fibers at the same excitation slit.

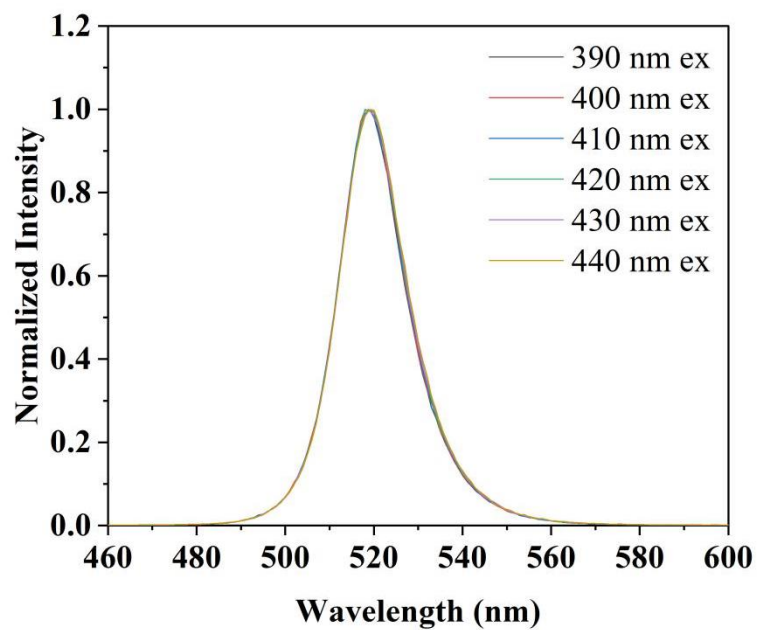

**Supplementary Fig. 29.** The excitation wavelength-dependent PL spectra of CsPbBr<sub>3</sub>@HPβCD@PFOS fibers.

**Supplementary Table 6.** The parameters of average lifetime ( $\tau_a$ ), PLQY, radiative recombination rate and non-radiative recombination rate for different fibers at 300 K.

| Samples                                 | $\tau_a$<br>ns | PLQY<br>% | $\kappa_{rad}$<br>$10^6/s^*$ | $\kappa_{non}$<br>$10^6/s^*$ |
|-----------------------------------------|----------------|-----------|------------------------------|------------------------------|
| CsPbBr <sub>3</sub>                     | 9.25           | 2.15      | 2.32                         | 10.81                        |
| CsPbBr <sub>3</sub> @HP $\beta$ CD      | 93.85          | 33.89     | 3.84                         | 6.82                         |
| CsPbBr <sub>3</sub> @HP $\beta$ CD@PFOS | 52.80          | 49.70     | 9.41                         | 9.53                         |

\* The radiative recombination and non-radiative recombination rate are calculated based on the following equations (1):

$$PLQY = \kappa_{rad} / (\kappa_{rad} + \kappa_{non}), \quad \tau_a = 1 / (\kappa_{rad} + \kappa_{non}) \quad (1)$$

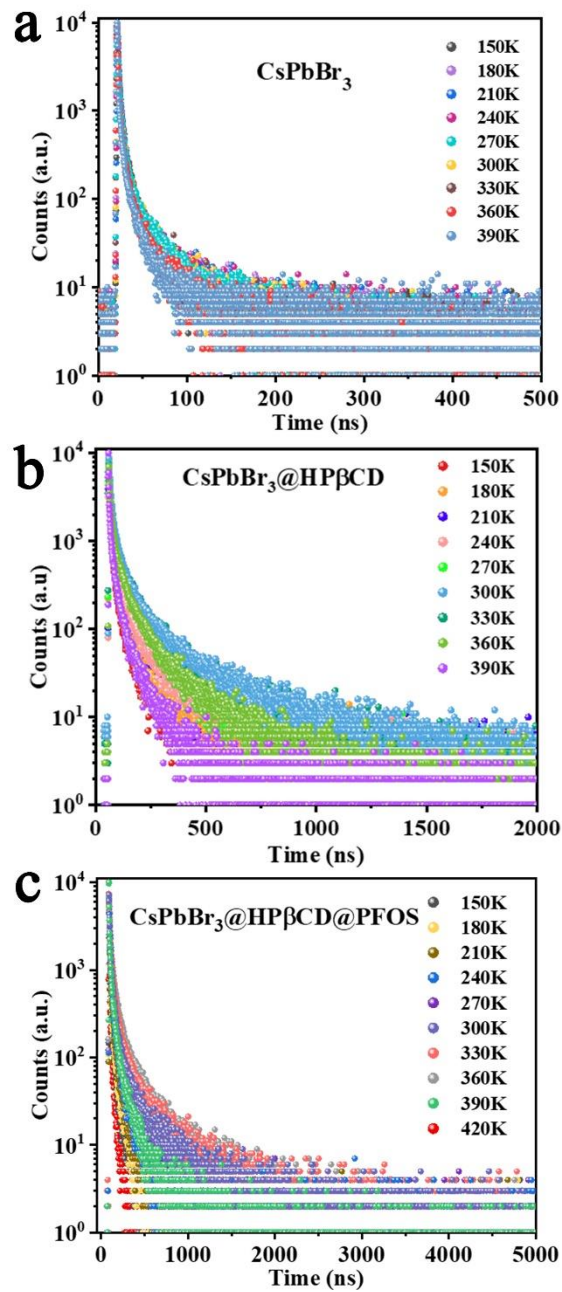

**Supplementary Fig. 30. Temperature-dependent time-resolved photoluminescence (TRPL) characterization.** (a)  $\text{CsPbBr}_3$  fibers, (b)  $\text{CsPbBr}_3@HP\beta CD$  fibers and (c)  $\text{CsPbBr}_3@HP\beta CD@PFOS$  fibers.

**Supplementary Table 7.** The PL lifetime decay parameters of CsPbBr<sub>3</sub> fibers at different temperatures.

| Temperature<br>(K) | $\tau_1$<br>(ns) | A <sub>1</sub><br>% | $\tau_2$<br>(ns) | A <sub>2</sub><br>% | $\tau_3$<br>(ns) | A <sub>3</sub><br>% | $\tau_{av}^*$<br>(ns) |
|--------------------|------------------|---------------------|------------------|---------------------|------------------|---------------------|-----------------------|
| 150                | 0.98             | 42.71               | 5.85             | 46.35               | 38.35            | 10.94               | 7.33                  |
| 180                | 1.00             | 40.61               | 4.96             | 47.33               | 41.97            | 12.06               | 7.82                  |
| 210                | 0.92             | 35.70               | 4.41             | 47.83               | 37.87            | 16.47               | 8.67                  |
| 240                | 0.87             | 38.86               | 5.26             | 42.44               | 42.05            | 17.70               | 10.02                 |
| 270                | 0.97             | 47.67               | 5.87             | 37.00               | 42.93            | 15.33               | 9.22                  |
| 300                | 0.93             | 47.38               | 5.78             | 36.44               | 41.49            | 16.18               | 9.26                  |
| 330                | 0.95             | 50.05               | 6.41             | 35.25               | 40.51            | 14.70               | 8.69                  |
| 360                | 0.86             | 55.11               | 5.45             | 32.26               | 32.38            | 12.63               | 6.32                  |
| 390                | 0.82             | 57.93               | 5.40             | 31.17               | 29.02            | 10.89               | 5.32                  |

\*The average lifetime ( $\tau_{av}$ ) can be calculated as the function (2):

$$\tau_{av} = \frac{A_1\tau_1^2 + A_2\tau_2^2 + A_3\tau_3^2}{A_1\tau_1 + A_2\tau_2 + A_3\tau_3} \quad (2)$$

**Supplementary Table 8.** The PL lifetime decay parameters of CsPbBr<sub>3</sub>@HP $\beta$ CD fibers at different temperatures.

| <b>Temperature<br/>(K)</b> | <b><math>\tau_1</math><br/>(ns)</b> | <b>A<sub>1</sub><br/>%</b> | <b><math>\tau_2</math><br/>(ns)</b> | <b>A<sub>2</sub><br/>%</b> | <b><math>\tau_3</math><br/>(ns)</b> | <b>A<sub>3</sub><br/>%</b> | <b><math>\tau_{av}^*</math><br/>(ns)</b> |
|----------------------------|-------------------------------------|----------------------------|-------------------------------------|----------------------------|-------------------------------------|----------------------------|------------------------------------------|
| <b>150</b>                 | 3.73                                | 44.85                      | 20.48                               | 42.08                      | 147.01                              | 13.07                      | 29.51                                    |
| <b>180</b>                 | 4.46                                | 45.05                      | 24.65                               | 40.26                      | 179.10                              | 14.69                      | 38.24                                    |
| <b>210</b>                 | 4.85                                | 43.45                      | 26.52                               | 40.14                      | 185.56                              | 16.41                      | 43.20                                    |
| <b>240</b>                 | 5.44                                | 36.96                      | 29.71                               | 44.04                      | 209.02                              | 19.00                      | 54.81                                    |
| <b>270</b>                 | 7.06                                | 34.48                      | 38.94                               | 44.76                      | 237.94                              | 20.76                      | 69.27                                    |
| <b>300</b>                 | 7.18                                | 26.79                      | 44.29                               | 45.67                      | 260.39                              | 27.54                      | 93.85                                    |
| <b>330</b>                 | 6.36                                | 21.23                      | 44.51                               | 47.64                      | 232.00                              | 31.14                      | 94.78                                    |
| <b>360</b>                 | 4.49                                | 20.63                      | 34.16                               | 49.06                      | 165.64                              | 30.32                      | 67.90                                    |
| <b>390</b>                 | 2.66                                | 26.88                      | 17.80                               | 48.35                      | 84.18                               | 24.77                      | 30.16                                    |

**Supplementary Table 9.** The PL lifetime decay parameters of CsPbBr<sub>3</sub>@HPβCD@PFOS fibers at different temperatures.

| <b>Temperature<br/>(K)</b> | <b><math>\tau_1</math><br/>(ns)</b> | <b>A<sub>1</sub><br/>%</b> | <b><math>\tau_2</math><br/>(ns)</b> | <b>A<sub>2</sub><br/>%</b> | <b><math>\tau_3</math><br/>(ns)</b> | <b>A<sub>3</sub><br/>%</b> | <b><math>\tau_{av}^*</math><br/>(ns)</b> |
|----------------------------|-------------------------------------|----------------------------|-------------------------------------|----------------------------|-------------------------------------|----------------------------|------------------------------------------|
| <b>150</b>                 | 2.15                                | 48.15                      | 12.08                               | 35.91                      | 68.71                               | 15.94                      | 16.33                                    |
| <b>180</b>                 | 2.72                                | 48.89                      | 10.00                               | 28.16                      | 68.29                               | 22.96                      | 19.82                                    |
| <b>210</b>                 | 3.91                                | 41.16                      | 21.04                               | 42.16                      | 105.98                              | 16.68                      | 28.15                                    |
| <b>240</b>                 | 4.85                                | 41.42                      | 27.45                               | 42.80                      | 145.95                              | 15.77                      | 36.78                                    |
| <b>270</b>                 | 5.72                                | 40.74                      | 31.16                               | 43.06                      | 179.33                              | 16.20                      | 44.80                                    |
| <b>300</b>                 | 7.07                                | 40.91                      | 39.52                               | 42.54                      | 200.00                              | 16.55                      | 52.80                                    |
| <b>330</b>                 | 7.59                                | 32.62                      | 41.77                               | 42.04                      | 257.99                              | 25.34                      | 85.41                                    |
| <b>360</b>                 | 7.24                                | 27.09                      | 43.70                               | 45.79                      | 252.70                              | 27.12                      | 90.48                                    |
| <b>390</b>                 | 3.76                                | 26.99                      | 22.98                               | 44.85                      | 121.67                              | 28.16                      | 45.58                                    |
| <b>420</b>                 | 3.25                                | 39.54                      | 20.74                               | 44.47                      | 110.68                              | 15.99                      | 40.83                                    |



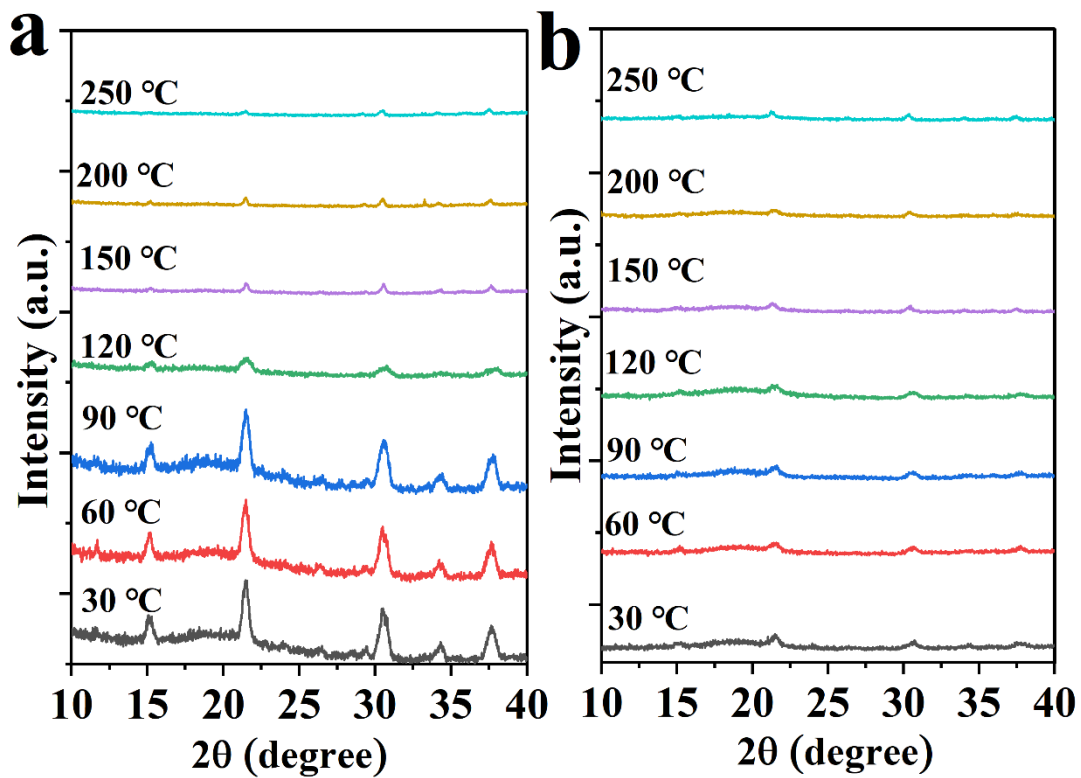

Supplementary Fig. 31. Temperature-dependent XRD patterns. (a) CsPbBr<sub>3</sub> fibers and (b) CsPbBr<sub>3</sub>@HPβCD@PFOS fibers.

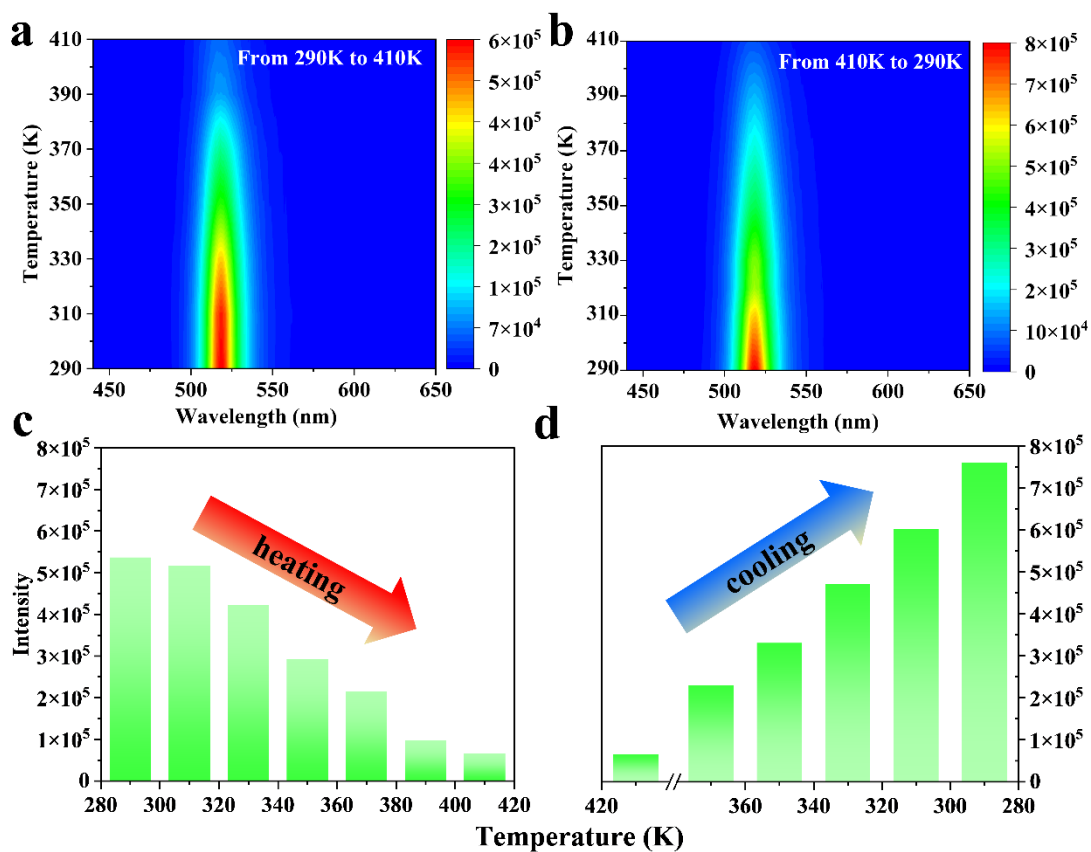

**Supplementary Fig. 32.** The temperature-dependent PL intensity mapping and evolution of CsPbBr<sub>3</sub>@HPβCD@PFOS fibrous film, which was heated from 290 K to 410 K (a, c) and cooled down from 410 K to 290 K (b, d).

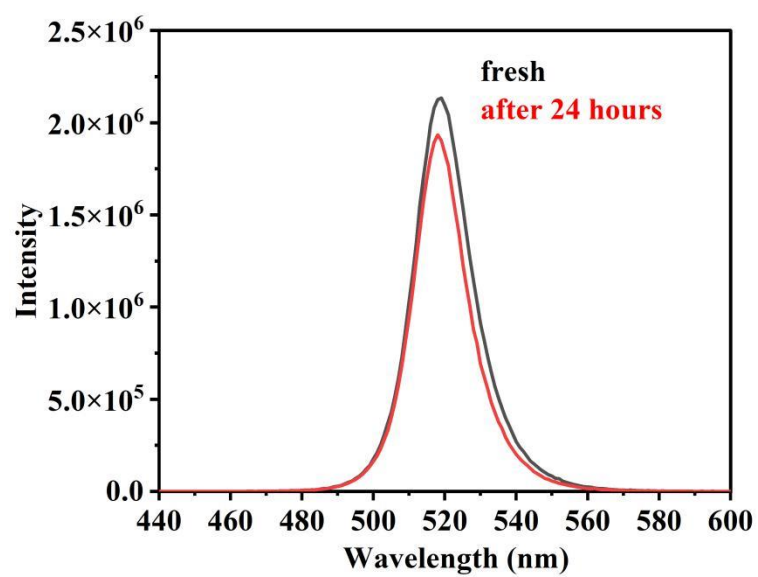

**Supplementary Fig. 33.** The PL intensity of the CsPbBr<sub>3</sub>@HPβCD@PFOS textile before and after 24 h UV light irradiation.

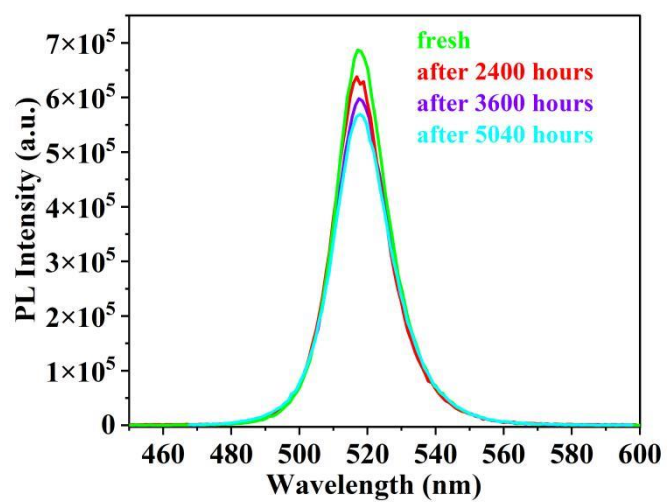

**Supplementary Fig. 34.** PL intensity evolution of the as-prepared PLT stored in ambient air for different durations.

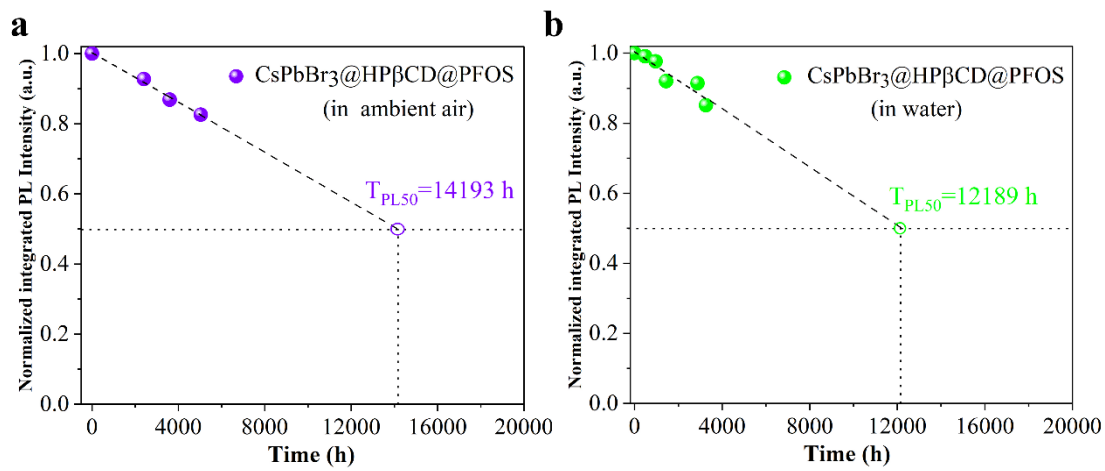

**Supplementary Fig. 35.**  $T_{PL50}$  evaluation of the as-prepared PLTs under ambient storage (a) or water immersion (b).

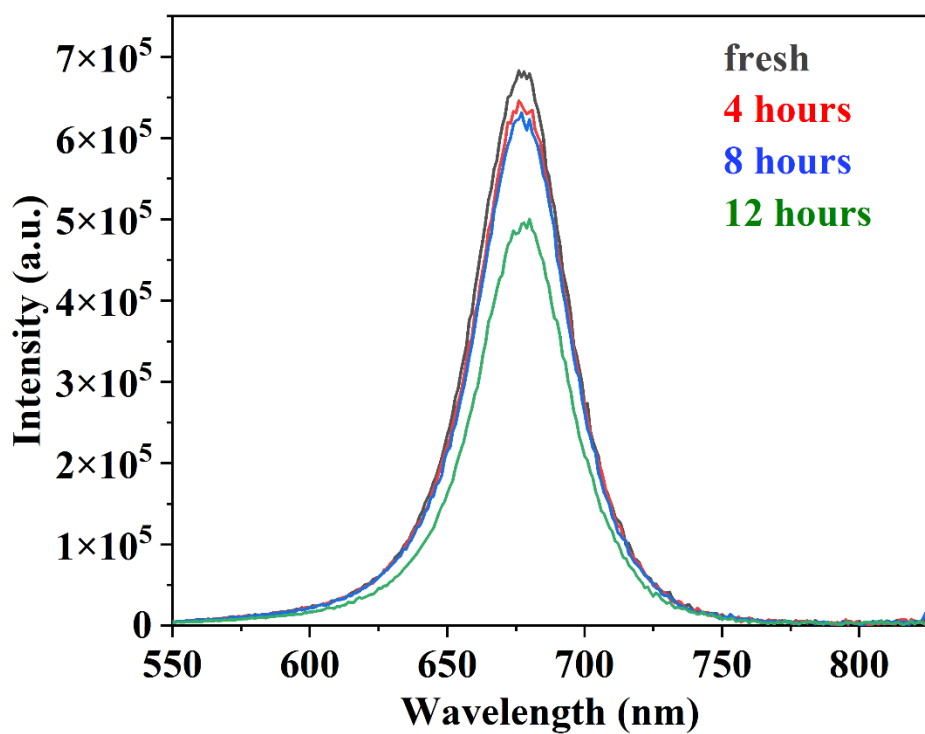

**Supplementary Fig. 36.** The PL intensity evolution of the red-emitting CsPb(Br/I)<sub>3</sub>@HP $\beta$ CD@PFOS textile after UV light irradiation for 12 hours.

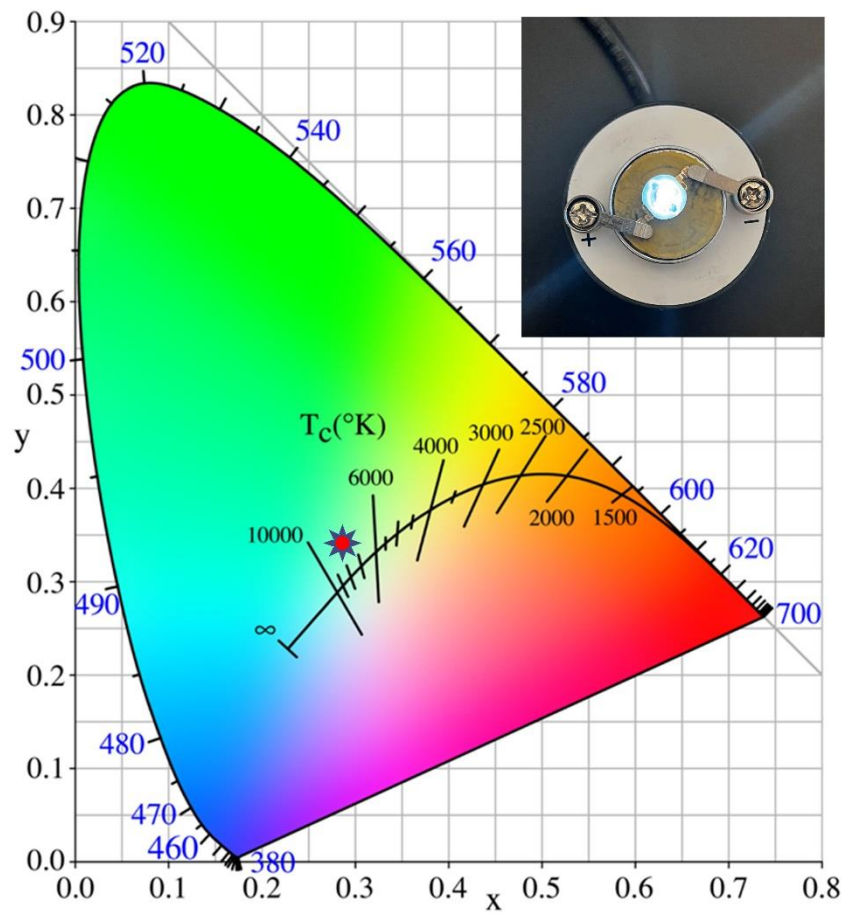

**Supplementary Fig. 37.** The 1931 CIE chromaticity coordinates of white LED fabricated with three kinds of different-colored PLTs. (The working voltage is 5 V and the driving current is 100 mA.)

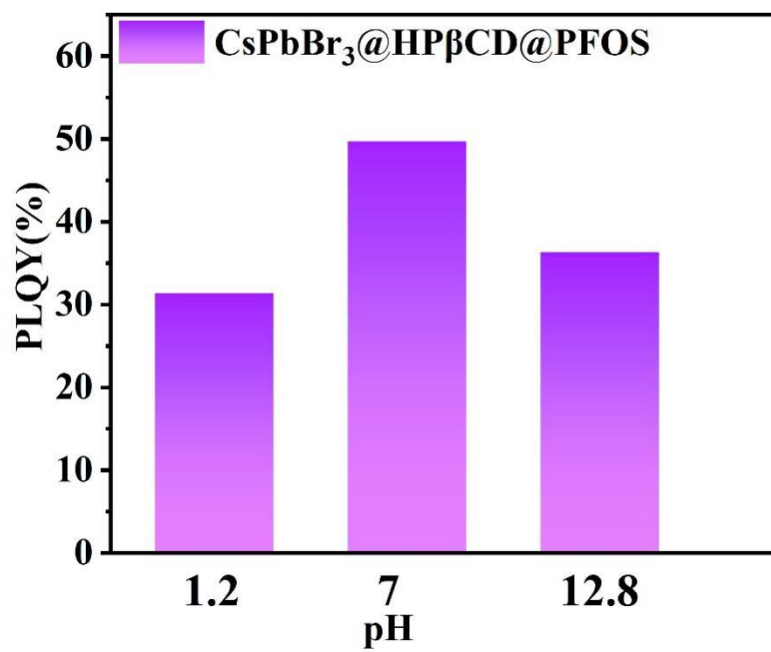

**Supplementary Fig. 38.** The PLQYs of PLTs in acidic, neutral and basic water solution.



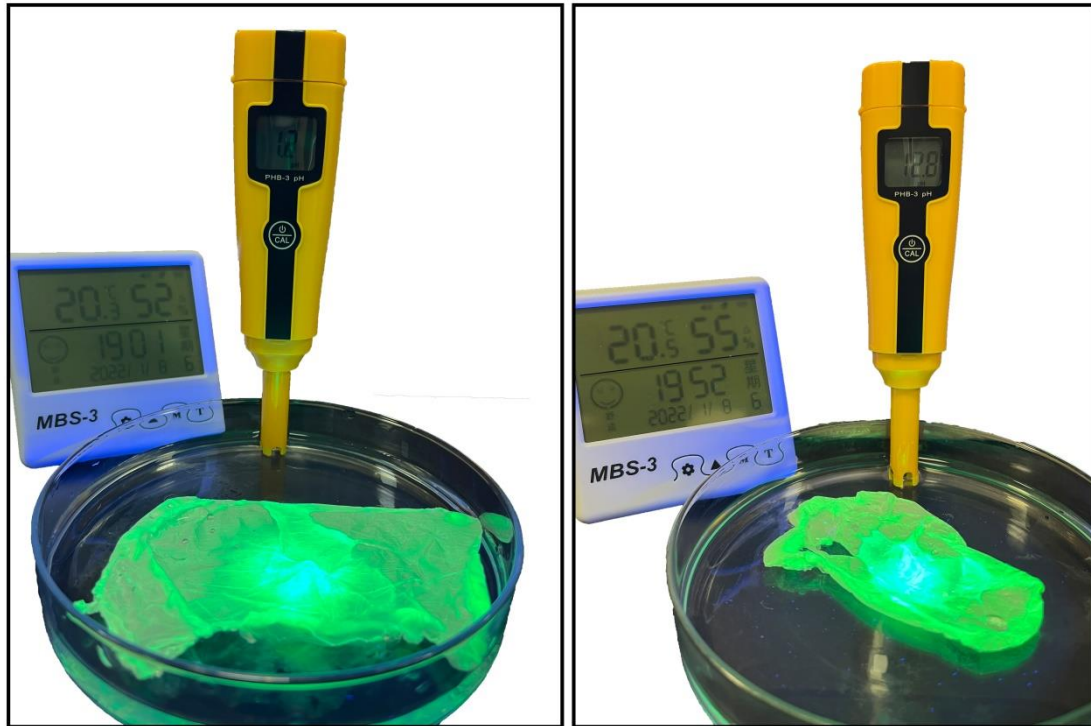

**Supplementary Fig. 39.** Images of PLTs under UV light irradiation immersed in acidic (pH = 1.2) (left) or basic (pH =12.8) water (right).

**Supplementary Table 10.** A summary of the state-of-the-art luminescent perovskite nanocrystals-based composites and corresponding large-area luminescent films.

| Samples                                                         | Methods                                                                                 | Stability                                                    |                                                                         |                                                                                        | PLQY (%)      | PL FWHM (nm) | Pb <sup>2+</sup> ions leakage                                          | Film area                                                    | Ref.             |
|-----------------------------------------------------------------|-----------------------------------------------------------------------------------------|--------------------------------------------------------------|-------------------------------------------------------------------------|----------------------------------------------------------------------------------------|---------------|--------------|------------------------------------------------------------------------|--------------------------------------------------------------|------------------|
|                                                                 |                                                                                         | Water/polar solvent                                          | High Temperature                                                        | UV irradiation                                                                         |               |              |                                                                        |                                                              |                  |
| PS@CsPbBr <sub>3</sub> @cyclo dextrin@PFOS                      | Single-nozzle electrospinning                                                           | Preserved > 85% of PL intensity after 3260 h water immersion | stable up to 250 °C                                                     | Preserved 90.3% of PL intensity under 120 mW cm <sup>-2</sup> irradiation for 24 h     | 49.7 (film)   | 16.96        | < 3.94 ppt after dynamic water scouring for 3,300 h                    | Up to 42000 cm <sup>2</sup> of flexible luminescent textiles | <b>This work</b> |
| (CsPbBr <sub>3</sub> ) <sub>0.25</sub> (ZIF-62) <sub>0.75</sub> | Liquid-phase sintering                                                                  | Preserved 80% of PL intensity after 10000 h water immersion  | Preserved over 80 % PL intensity after 100 °C in Ar or 80 °C in air     | Preserved 90% of PL intensity under 57 mW cm <sup>-2</sup> irradiation for 5000 s      | 46.9 (solid)  | 24.4         | Below the detection limit of ICP-OES after 10,000 h immersion in water | N/A                                                          | ref.14           |
| CsPb(Br <sub>1-x</sub> I <sub>x</sub> ) <sub>3</sub> in glass   | Direct lithography                                                                      | Exhibit notable stability against organic solution           | stable up to 250 °C                                                     | No change in PL intensity under 2 W cm <sup>-2</sup> irradiation for 12 h              | Not reported  | N/A          | N/A                                                                    | N/A                                                          | ref.15           |
| CsPbBr <sub>3</sub> /Cs <sub>4</sub> PbBr <sub>6</sub>          | Evaporation of nonstoichiometric CsBr and PbBr <sub>2</sub>                             | N/A                                                          | N/A                                                                     | N/A                                                                                    | 40.8 (film)   | N/A          | N/A                                                                    | 90 cm <sup>2</sup>                                           | ref.20           |
| CsPbBr <sub>3</sub> @SiO <sub>2</sub> /ZrO <sub>2</sub> /PMMA   | sol-gel reaction                                                                        | N/A                                                          | Emission band changes upon increasing the temperature from RT to 120 °C | N/A                                                                                    | 65 (powder)   | 16           | N/A                                                                    | N/A                                                          | ref.21           |
| CsPb(Br <sub>0.84</sub> Cl <sub>0.16</sub> ) <sub>3</sub>       | Blade coating                                                                           | N/A                                                          | N/A                                                                     | N/A                                                                                    | 16.18 (film)  | N/A          | N/A                                                                    | 54 cm <sup>2</sup>                                           | ref.22           |
| MAPbBr <sub>3</sub> @Pb-MOF                                     | Rotary evaporation, followed by washing with diethyl ether, and then dried under vacuum | N/A                                                          | N/A                                                                     | N/A                                                                                    | 39.6 (powder) | 25           | N/A                                                                    | N/A                                                          | ref.23           |
| CsPbBr <sub>3</sub> /Cs <sub>4</sub> PbBr <sub>6</sub>          | heterogeneous liquid/solid phase interfacial thermal reaction                           | N/A                                                          | stable up to 200 °C                                                     | The PL intensity decreased to 29.4% under 24 mW cm <sup>-2</sup> irradiation for 12 h. | 94 (powder)   | 20           | N/A                                                                    | N/A                                                          | ref.24           |

|                                                               |                                                                |                                                                                          |                                                                                           |                                                                      |              |       |                                                                                             |                                                                                |        |
|---------------------------------------------------------------|----------------------------------------------------------------|------------------------------------------------------------------------------------------|-------------------------------------------------------------------------------------------|----------------------------------------------------------------------|--------------|-------|---------------------------------------------------------------------------------------------|--------------------------------------------------------------------------------|--------|
| CsPbBr <sub>3</sub> @TFE-HE fluorinated ester                 | Sonication, UV photo-polymerization                            | Emitting bright green light after being immersed in water for a month                    | N/A                                                                                       | N/A                                                                  | 49.92 (film) | 19    | N/A                                                                                         | N/A                                                                            | ref.33 |
| CsPbBr <sub>3</sub> @PMMA@T PU                                | Electro-microfluidic spinning                                  | Preserved 82% of PL intensity after 120 h water immersion                                | N/A                                                                                       | N/A                                                                  | 39 (film)    | 23    | N/A                                                                                         | N/A                                                                            | ref.35 |
| MAPbX <sub>3</sub> , (X=Cl, Br, and I)@PAN                    | Fiber-spinning chemistry based on a microfluidic blow spinning | Preserved 92% of PL intensity in water for 7 days                                        | The PL intensity decreases by 20 % in the first 0.5 h at 150 °C                           | N/A                                                                  | 71 (film)    | 21    | N/A                                                                                         | 120 ×30 cm                                                                     | ref.37 |
| PAN/MAPbBr <sub>3</sub> nanofiber films                       | Fiber spinning chemistry                                       | Preserved 35% of PL intensity in water for 120 h                                         | The PL intensity declined by 25% in the first 1 h at 120 °C                               | N/A                                                                  | 58 (film)    | 23    | N/A                                                                                         | N/A                                                                            | ref.38 |
| CsPbX <sub>3</sub> @PS                                        | Swelling-shrinking strategy                                    | Preserved 20-30% of PL intensity in water for 30 days.                                   | CsPbBr <sub>3</sub> @PS composites are stable under temperature range from 100 to 190 °C  | Preserved 40% of PL intensity under UV-light irradiation for 15 days | 68 (powder)  | N/A   | Leaking Pb <sup>2+</sup> concentration is 1.931 ppm after stirring for 24 hours.            | N/A                                                                            | ref.39 |
| MAPbBr <sub>3</sub> @polymer gels                             | Fast one-pot photopolymerization method                        | Preserved 95.3% of PL in water for 16 days                                               | PL intensity was well maintained at 100 °C, but dropped significantly at 150 °C in 1 hour | N/A                                                                  | N/A          | 17-22 | Leaking Pb <sup>2+</sup> concentration is 0.677 ppm after 1 day and 0.749 ppm after 20 days | 20 mm × 20 mm                                                                  | ref.40 |
| CsPbX <sub>3</sub> @polymer fibers                            | Electrospinning                                                | Retained over 70% of PLQY after being immersed in water for 192 h                        | PL QY maintained over 50% after being heated at 80 °C for 120 min                         | N/A                                                                  | 48 (film)    | 24    | N/A                                                                                         | 10 cm × 20 cm                                                                  | ref.41 |
| MAPbBr <sub>3</sub> quantum wires in porous alumina membranes | Close-spaced vapour reaction                                   | Preserved 99% of PL intensity after 5 days in ambient air with ~45-55% relative humidity | N/A                                                                                       | N/A                                                                  | 92 (arrays)  | 19    | N/A                                                                                         | 4 inch wafer (~81 cm <sup>2</sup> ) and ~7 cm <sup>2</sup> flexible LED device | ref.52 |
