# Supplementary material for: Large-area waterproof and durable perovskite luminescent textiles
Source: PubMed Central journal article supplement (PMC9842651; doi:10.1038/s41467-023-35830-8), 2023-01-16
Supplement: 41467_2023_35830_MOESM2_ESM.pdf [file 41467_2023_35830_MOESM2_ESM.pdf]

## **Description of Additional Supplementary Files**

File Name: Supplementary Movie 1

Description: Electrospinning PLTs process.

File Name: Supplementary Movie 2

Description: The luminescent properties of folded CsPbBr<sub>3</sub>@HPβCD@PFOS-based PLT.

File Name: Supplementary Movie 3

Description: The PLT under dynamic seawater scouring and its continuous luminescence.
